# Supplementary material for: The Incidence of Perioperative Stroke: Estimate Using State and National Databases and Systematic Review
Source: PubMed Central journal article supplement — J Stroke. 2019 Sep 30;21(3):290–301. doi: 10.5853/jos.2019.00304 (PMC6780011; doi:10.5853/jos.2019.00304), 2019-09-30
Supplement: jos-2019-00304-suppl2.pdf [file jos-2019-00304-suppl2.pdf]

**Supplementary Table 1.** Surgical subcategories used and the surgical procedures they include

| Surgical subcategory                                             | ICD-9 code | Surgical procedure(s)                                                                                                                                                                                                                                                                                                                                                                                                                                                                            |
|------------------------------------------------------------------|------------|--------------------------------------------------------------------------------------------------------------------------------------------------------------------------------------------------------------------------------------------------------------------------------------------------------------------------------------------------------------------------------------------------------------------------------------------------------------------------------------------------|
| Ventricular shunt to extracranial site                           | 0231       | Ventricle to nasopharynx shunt, ventriculomastoid anastomosis                                                                                                                                                                                                                                                                                                                                                                                                                                    |
| Craniotomy and craniectomy; reopening of craniotomy site         | 0123       | -                                                                                                                                                                                                                                                                                                                                                                                                                                                                                                |
| Other incision of brain                                          | 0139       | Amygdalohippocampotomy, drainage of intracerebral hematoma, incision of brain NOS<br>Excludes: division of cortical adhesions                                                                                                                                                                                                                                                                                                                                                                    |
| Other craniectomy                                                | 0124       | Cranial (decompression, exploration, trephination), craniotomy NOS, craniotomy with removal of (epidural abscess, extradural hematoma, foreign body of skull)<br>Excludes: removal of foreign body with incision into brain                                                                                                                                                                                                                                                                      |
| Incision of cerebral meninges                                    | 0131       | Drainage of (intracranial hygroma, subarachnoid abscess (cerebral), subdural empyema)                                                                                                                                                                                                                                                                                                                                                                                                            |
| Insertion of implantable heart assist system                     | 3766       | Axial flow heart assist system, diagonal pump heart assist system, left ventricular assist device, pulsatile heart assist system, right ventricular assist device, rotary pump heart assist system, transportable implantable heart assist system, ventricular assist device not otherwise specified<br>Excludes: implant of pulsation balloon, implantation of total internal biventricular heart replacement system (artificial heart), insertion of percutaneous external heart assist device |
| Open heart valvuloplasty of aortic valve without replacement     | 3511       | -                                                                                                                                                                                                                                                                                                                                                                                                                                                                                                |
| Open and other replacement of aortic valve with tissue graft     | 3521       | Repair of aortic valve with tissue graft (autograft, heterograft, homograft)                                                                                                                                                                                                                                                                                                                                                                                                                     |
| Implant of pulsation balloon                                     | 3761       | -                                                                                                                                                                                                                                                                                                                                                                                                                                                                                                |
| (Aorto)coronary bypass of three coronary arteries                | 3613       | -                                                                                                                                                                                                                                                                                                                                                                                                                                                                                                |
| Endovascular removal of obstruction from head and neck vessel(s) | 3974       | Endovascular embolectomy, endovascular thrombectomy of pre-cerebral and cerebral vessels, mechanical embolectomy or thrombectomy<br>Excludes: endarterectomy of intracranial vessels and other vessels of head and neck, occlusive endovascular repair of head or neck vessels, open embolectomy or thrombectomy                                                                                                                                                                                 |
| Extracranial-intracranial vascular bypass                        | 3928       | -                                                                                                                                                                                                                                                                                                                                                                                                                                                                                                |
| Clipping of aneurysm                                             | 3951       | Excludes: clipping of arteriovenous fistula                                                                                                                                                                                                                                                                                                                                                                                                                                                      |
| Endarterectomy; other vessels of head and neck                   | 3812       | Extirpation of matter from: right/left common carotid artery, right/left internal carotid artery, right/left external carotid artery, right/left vertebral artery, facial artery, right/left temporal artery, right/left thyroid artery                                                                                                                                                                                                                                                          |
| Percutaneous transluminal coronary angioplasty                   | 0066       | Balloon angioplasty of coronary artery, coronary atherectomy, percutaneous coronary angioplasty NOS                                                                                                                                                                                                                                                                                                                                                                                              |
| Heart transplantation                                            | 3751       | -                                                                                                                                                                                                                                                                                                                                                                                                                                                                                                |
| Combined heart-lung transplantation                              | 336        | -                                                                                                                                                                                                                                                                                                                                                                                                                                                                                                |
| Bilateral lung transplantation                                   | 3352       | Double-lung transplantation, <i>en bloc</i> transplantation                                                                                                                                                                                                                                                                                                                                                                                                                                      |
| Other transplant of liver                                        | 5059       | Exclude: auxiliary hepatic transplantation leaving patient's own liver <i>in situ</i>                                                                                                                                                                                                                                                                                                                                                                                                            |
| Pancreatic transplant NOS                                        | 5280       | -                                                                                                                                                                                                                                                                                                                                                                                                                                                                                                |
| Reopening of recent thoracotomy site                             | 3403       | -                                                                                                                                                                                                                                                                                                                                                                                                                                                                                                |
| Other and unspecified pneumonectomy                              | 3259       | Excludes: thoracoscopic pneumonectomy                                                                                                                                                                                                                                                                                                                                                                                                                                                            |
| Other lobectomy of lung                                          | 3249       | Excludes: thoracoscopic lobectomy of lung                                                                                                                                                                                                                                                                                                                                                                                                                                                        |
| Decortication of lung                                            | 3451       | Excludes: thoracoscopic decortication of lung                                                                                                                                                                                                                                                                                                                                                                                                                                                    |
| Thoracoscopic excision of lesion or tissue of lung               | 3220       | Thoracoscopic wedge resection                                                                                                                                                                                                                                                                                                                                                                                                                                                                    |
| Partial excision of pituitary gland, transfrontal approach       | 0761       | Cryohypophysectomy, partial transfrontal approach, division of hypophyseal stalk transfrontal approach, excision of lesion of pituitary (hypophysis) transfrontal approach, hypophysectomy subtotal transfrontal approach, infundibulotomy hypophyseal transfrontal approach<br>Excludes: biopsy of pituitary gland transfrontal approach                                                                                                                                                        |
| Partial excision of pineal gland                                 | 0753       | Excludes: biopsy of pineal gland                                                                                                                                                                                                                                                                                                                                                                                                                                                                 |
| Division of thyroid isthmus                                      | 0691       | Transection of thyroid isthmus                                                                                                                                                                                                                                                                                                                                                                                                                                                                   |
| Unilateral adrenalectomy                                         | 0722       | Adrenalectomy NOS<br>Excludes: excision of remaining adrenal gland                                                                                                                                                                                                                                                                                                                                                                                                                               |

Supplementary Table 1. Continued

| Surgical subcategory                                                       | ICD-9 code | Surgical procedure(s)                                                                                                                                                                                                                                                                                                  |
|----------------------------------------------------------------------------|------------|------------------------------------------------------------------------------------------------------------------------------------------------------------------------------------------------------------------------------------------------------------------------------------------------------------------------|
| Complete thyroidectomy                                                     | 064        | Excludes: complete substernal thyroidectomy                                                                                                                                                                                                                                                                            |
| Open total intra-abdominal colectomy                                       | 4582       | -                                                                                                                                                                                                                                                                                                                      |
| Open and other left hemicolectomy                                          | 4575       | Excludes: proctosigmoidectomy, second stage Mikulicz operation                                                                                                                                                                                                                                                         |
| Exploratory laparotomy                                                     | 5411       | Excludes: exploration incidental to intra-abdominal surgery                                                                                                                                                                                                                                                            |
| Other partial resection of small intestine                                 | 4562       | Duodenectomy, ileectomy, jejunectomy<br>Excludes: duodenectomy with synchronous pancreatectomy, resection of cecum and terminal ileum                                                                                                                                                                                  |
| Cholecystectomy                                                            | 5122       | Excludes: laparoscopic cholecystectomy                                                                                                                                                                                                                                                                                 |
| Other removal or destruction of corneal lesion                             | 1149       | Excision of cornea NOS<br>Excludes: biopsy of cornea                                                                                                                                                                                                                                                                   |
| Other extracapsular extraction of lens                                     | 1359       | Exclude: extracapsular extraction of lens by temporal inferior route                                                                                                                                                                                                                                                   |
| Other repair of retinal detachment                                         | 1459       | Exclude: repair of retinal detachment with diathermy, cryotherapy, xenon arc photocoagulation, laser photocoagulation, photocoagulation of unspecified type                                                                                                                                                            |
| Other operations on vitreous                                               | 1479       | Exclude: open sky technique, removal of vitreous, anterior approach, aspiration of vitreous by posterior sclerotomy, mechanical vitrectomy by anterior/posterior approach, injection of vitreous substitute                                                                                                            |
| Suture of corneal laceration                                               | 1151       | -                                                                                                                                                                                                                                                                                                                      |
| Total splenectomy                                                          | 415        | Splenectomy NOS                                                                                                                                                                                                                                                                                                        |
| Radical excision of periaortic lymph nodes                                 | 4052       | -                                                                                                                                                                                                                                                                                                                      |
| Biopsy of lymphatic structure                                              | 4011       | -                                                                                                                                                                                                                                                                                                                      |
| Radical neck dissection, unilateral                                        | 4041       | -                                                                                                                                                                                                                                                                                                                      |
| Excision of axillary lymph node                                            | 4023       | -                                                                                                                                                                                                                                                                                                                      |
| Amputation above knee                                                      | 8417       | Amputation of leg through femur, amputation of thigh, conversion of below-knee amputation into above-knee amputation, supracondylar above-knee amputation                                                                                                                                                              |
| Atlas-axis spinal fusion                                                   | 8101       | Craniocervical fusion by (anterior, transoral, or posterior technique), C1-C2 fusion by (anterior, transoral, or posterior technique), occiput C2 fusion by (anterior, transoral, or posterior technique)                                                                                                              |
| Other amputation below knee                                                | 8415       | Amputation of leg through tibia and fibula NOS                                                                                                                                                                                                                                                                         |
| Partial hip replacement                                                    | 8152       | Bipolar endoprosthesis                                                                                                                                                                                                                                                                                                 |
| Open reduction of fracture with internal fixation; femur                   | 7935       | Excludes: that for separation of epiphysis                                                                                                                                                                                                                                                                             |
| Nephroureterectomy                                                         | 5551       | Nephroureterectomy with bladder cuff, total nephrectomy (unilateral)<br>Excludes: removal of transplanted kidney                                                                                                                                                                                                       |
| Percutaneous nephrostomy without fragmentation                             | 5503       | Nephrostolithotomy (nephroscopic), percutaneous removal of kidney stone(s) by: (basket extraction, forceps extraction [nephroscopic]), pyelostolithotomy (nephroscopic), with placement of catheter down ureter<br>Excludes: percutaneous removal by fragmentation, repeat nephroscopic removal during current episode |
| Radical cystectomy                                                         | 5771       | Pelvic exenteration in male, removal of (bladder, prostate, seminal vesicles, and fat), removal of (bladder, urethra, and fat in a female)<br>Excludes: that as part of pelvic exenteration in female                                                                                                                  |
| Other transurethral excision or destruction of lesion or tissue of bladder | 5749       | Endoscopic resection of bladder lesion<br>Excludes: transurethral biopsy of bladder, transurethral fistulectomy                                                                                                                                                                                                        |
| Control of (postoperative) hemorrhage of bladder                           | 5793       | -                                                                                                                                                                                                                                                                                                                      |
| Other transurethral prostatectomy                                          | 6029       | Excision of median bar by transurethral approach, transurethral electrovaporization of prostate, transurethral enucleative procedure, transurethral prostatectomy NOS, transurethral resection of prostate                                                                                                             |
| Control of (postoperative) hemorrhage of prostate                          | 6094       | Coagulation of prostatic bed, cystoscopy for control of prostatic hemorrhage                                                                                                                                                                                                                                           |
| Radical prostatectomy                                                      | 605        | Prostatovesiculectomy, radical prostatectomy by any approach<br>Excludes: cystoprostatectomy                                                                                                                                                                                                                           |
| Unilateral orchiectomy                                                     | 623        | Orchidectomy (with epididymectomy) NOS                                                                                                                                                                                                                                                                                 |

**Supplementary Table 1.** Continued

| Surgical subcategory                                              | ICD-9 code | Surgical procedure(s)                                                                                                                                                                                                                                                                                                                                                                       |
|-------------------------------------------------------------------|------------|---------------------------------------------------------------------------------------------------------------------------------------------------------------------------------------------------------------------------------------------------------------------------------------------------------------------------------------------------------------------------------------------|
| Removal of both testes at same operative episode                  | 6241       | Bilateral orchidectomy NOS                                                                                                                                                                                                                                                                                                                                                                  |
| Low cervical cesarean section                                     | 741        | Lower uterine segment cesarean section                                                                                                                                                                                                                                                                                                                                                      |
| Other and unspecified total abdominal hysterectomy                | 6849       | -                                                                                                                                                                                                                                                                                                                                                                                           |
| Other removal of both ovaries and tubes at same operative episode | 6561       | Excludes: that by laparoscope                                                                                                                                                                                                                                                                                                                                                               |
| Laparoscopic total abdominal hysterectomy                         | 6841       | Total laparoscopic hysterectomy                                                                                                                                                                                                                                                                                                                                                             |
| Classical cesarean section                                        | 740        | Transperitoneal classical cesarean section                                                                                                                                                                                                                                                                                                                                                  |
| Fat graft of skin and subcutaneous tissue                         | 8687       | Replacement of subcutaneous tissue and fascia for (scalp, face, neck, chest, back, buttock, abdomen, perineum, pelvic region, arms, hands, legs, feet) with autologous tissue substitute percutaneous approach, extraction of subcutaneous tissue and fascia for (scalp, face, neck, chest, back, buttock, abdomen, perineum, pelvic region, arms, hands, legs, feet) percutaneous approach |
| Bilateral simple mastectomy                                       | 8542       | Bilateral complete mastectomy                                                                                                                                                                                                                                                                                                                                                               |
| Removal of implant of breast                                      | 8594       | -                                                                                                                                                                                                                                                                                                                                                                                           |
| Other free skin graft to other sites                              | 8669       | Excludes: heterograft, homograft                                                                                                                                                                                                                                                                                                                                                            |
| Homograft to skin                                                 | 8666       | Graft to skin of amnionic membrane from donor skin from donor                                                                                                                                                                                                                                                                                                                               |
| Sphenoidectomy                                                    | 2264       | -                                                                                                                                                                                                                                                                                                                                                                                           |
| Incision of multiple nasal sinuses                                | 2253       | -                                                                                                                                                                                                                                                                                                                                                                                           |
| Sphenoidotomy                                                     | 2252       | -                                                                                                                                                                                                                                                                                                                                                                                           |
| Control of epistaxis by ligation of ethmoidal arteries            | 2104       | -                                                                                                                                                                                                                                                                                                                                                                                           |
| Ethmoidectomy                                                     | 2263       | -                                                                                                                                                                                                                                                                                                                                                                                           |

ICD-9, International Classification of Diseases, 9th revision; NOS, not otherwise specified.
