# Supplementary material for: The Incidence of Perioperative Stroke: Estimate Using State and National Databases and Systematic Review
Source: PubMed Central journal article supplement — J Stroke. 2019 Sep 30;21(3):290–301. doi: 10.5853/jos.2019.00304 (PMC6780011; doi:10.5853/jos.2019.00304), 2019-09-30
Supplement: jos-2019-00304-suppl4.pdf [file jos-2019-00304-suppl4.pdf]

**Supplementary Table 3.** One hundred surgeries that had the highest number of strokes

| Procedure name                                                                       | ICD-9 code | No. of stroke | Procedure frequency | Incidence of stroke (%) |
|--------------------------------------------------------------------------------------|------------|---------------|---------------------|-------------------------|
| Percutaneous transluminal coronary angioplasty                                       | 0066       | 761           | 165,698             | 0.46                    |
| Other excision or destruction of lesion or tissue of brain                           | 0159       | 468           | 14,476              | 3.23                    |
| Hemodialysis                                                                         | 3995       | 454           | 115,663             | 0.39                    |
| Endarterectomy; other vessels of head and neck                                       | 3812       | 433           | 27,172              | 1.59                    |
| Open and other replacement of aortic valve with tissue graft                         | 3521       | 416           | 15,928              | 2.61                    |
| Incision of cerebral meninges                                                        | 0131       | 357           | 10,929              | 3.27                    |
| Clipping of aneurysm                                                                 | 3951       | 294           | 2,856               | 10.29                   |
| Interruption of the vena cava                                                        | 387        | 288           | 22,439              | 1.28                    |
| Open reduction of fracture with internal fixation; femur                             | 7935       | 275           | 51,207              | 0.54                    |
| Endovascular (total) embolization or occlusion of head and neck vessels              | 3972       | 252           | 4,174               | 6.4                     |
| Partial hip replacement                                                              | 8152       | 250           | 36,879              | 0.68                    |
| (Aorto)coronary bypass of three coronary arteries                                    | 3613       | 238           | 13,380              | 1.78                    |
| (Aorto)coronary bypass of two coronary arteries                                      | 3612       | 216           | 14,793              | 1.46                    |
| Open and other replacement of aortic valve                                           | 3522       | 205           | 8,633               | 2.37                    |
| Excision of lesion or tissue of cerebral meninges                                    | 0151       | 193           | 4,549               | 4.24                    |
| Thoracentesis                                                                        | 3491       | 175           | 45,733              | 0.38                    |
| Total knee replacement                                                               | 8154       | 173           | 191,443             | 0.09                    |
| Endovascular removal of obstruction from head and neck vessel(s)                     | 3974       | 171           | 926                 | 18.47                   |
| Angioplasty of other non-coronary vessel(s)                                          | 3950       | 157           | 32,919              | 0.48                    |
| Implant of pulsation balloon                                                         | 3761       | 151           | 6,913               | 2.18                    |
| Other incision of brain                                                              | 0139       | 138           | 2,628               | 5.25                    |
| (Aorto)coronary bypass of four or more coronary arteries                             | 3614       | 134           | 6,942               | 1.93                    |
| Other partial resection of small intestine                                           | 4562       | 121           | 19,867              | 0.61                    |
| Laparoscopic cholecystectomy                                                         | 5123       | 117           | 141,814             | 0.08                    |
| Open and other right hemicolectomy                                                   | 4573       | 117           | 20,075              | 0.58                    |
| Closed reduction of fracture with internal fixation; femur                           | 7915       | 114           | 22,214              | 0.51                    |
| Total hip replacement                                                                | 8151       | 111           | 98,769              | 0.11                    |
| Percutaneous angioplasty of extracranial vessel(s)                                   | 0061       | 110           | 4,312               | 2.55                    |
| Other craniotomy                                                                     | 124        | 104           | 3,030               | 3.43                    |
| Resection of vessel with replacement; thoracic vessels                               | 3845       | 98            | 1,499               | 6.54                    |
| Open and other replacement of mitral valve with tissue graft                         | 3523       | 95            | 2,783               | 3.41                    |
| Percutaneous abdominal drainage                                                      | 5491       | 93            | 46,708              | 0.2                     |
| Endovascular embolization or occlusion of vessel(s) of head or neck using bare coils | 3975       | 91            | 1,166               | 7.8                     |
| Open and other sigmoidectomy                                                         | 4576       | 90            | 18,441              | 0.49                    |
| (Aorto)coronary bypass of one coronary artery                                        | 3611       | 79            | 6,108               | 1.29                    |
| Open heart valvuloplasty of mitral valve without replacement                         | 3512       | 79            | 4,597               | 1.72                    |
| Other exploration and decompression of spinal canal                                  | 0309       | 77            | 37,627              | 0.2                     |
| Other endovascular procedures on other vessels                                       | 3979       | 76            | 6,577               | 1.16                    |
| Arteriovenostomy for renal dialysis                                                  | 3927       | 70            | 11,559              | 0.61                    |
| Single internal mammary-coronary artery bypass                                       | 3615       | 69            | 5,282               | 1.31                    |
| Other amputation below knee                                                          | 8415       | 66            | 8,776               | 0.75                    |
| Open and other replacement of mitral valve                                           | 3524       | 64            | 2,639               | 2.43                    |

Supplementary Table 3. Continued

| Procedure name                                                                    | ICD-9 code | No. of stroke | Procedure frequency | Incidence of stroke (%) |
|-----------------------------------------------------------------------------------|------------|---------------|---------------------|-------------------------|
| Excision or destruction of other lesion or tissue of heart, endovascular approach | 3734       | 62            | 20,145              | 0.31                    |
| Extracranial-intracranial vascular bypass                                         | 3928       | 60            | 434                 | 13.82                   |
| Ventricular shunt to abdominal cavity and organs                                  | 234        | 59            | 4,201               | 1.4                     |
| Cholecystectomy                                                                   | 5122       | 57            | 17,557              | 0.32                    |
| Other (peripheral) vascular shunt or bypass                                       | 3929       | 57            | 12,302              | 0.46                    |
| Open and other left hemicolectomy                                                 | 4575       | 56            | 6,733               | 0.83                    |
| Lumbar and lumbosacral fusion of the anterior column, posterior technique         | 8108       | 53            | 31,922              | 0.17                    |
| Amputation above knee                                                             | 8417       | 53            | 5,021               | 1.06                    |
| Insertion of intercostal catheter for drainage                                    | 3404       | 52            | 16,069              | 0.32                    |
| Other lysis of peritoneal adhesions                                               | 5459       | 48            | 18,711              | 0.26                    |
| Other craniectomy                                                                 | 0125       | 46            | 1,008               | 4.56                    |
| Other cervical fusion of the anterior column, anterior technique                  | 8102       | 45            | 41,651              | 0.11                    |
| Nephroureterectomy                                                                | 5551       | 45            | 16,516              | 0.27                    |
| Endovascular implantation of graft in thoracic aorta                              | 3973       | 45            | 1,216               | 3.7                     |
| Open reduction of fracture with internal fixation; tibia and fibula               | 7936       | 42            | 41,571              | 0.1                     |
| Resection of vessel with replacement; aorta, abdominal                            | 3844       | 42            | 2,570               | 1.63                    |
| Low cervical cesarean section                                                     | 741        | 41            | 516,134             | 0.01                    |
| Percutaneous nephrostomy without fragmentation                                    | 5503       | 41            | 9,998               | 0.41                    |
| Internal fixation of bone without fracture reduction; femur                       | 7855       | 40            | 10,171              | 0.39                    |
| Incision of vessel; lower limb arteries                                           | 3808       | 39            | 1,783               | 2.19                    |
| Endovascular implantation of other graft in abdominal aorta                       | 3971       | 37            | 8,414               | 0.44                    |
| Other lobectomy of lung                                                           | 3249       | 37            | 6,539               | 0.57                    |
| Biopsy of lymphatic structure                                                     | 4011       | 36            | 10,455              | 0.34                    |
| Other revision of vascular procedure                                              | 3949       | 35            | 6,309               | 0.55                    |
| Replacement of ventricular shunt                                                  | 0242       | 35            | 3,278               | 1.07                    |
| Extracorporeal membrane oxygenation                                               | 3965       | 34            | 389                 | 8.74                    |
| Other transurethral prostatectomy                                                 | 6029       | 33            | 25,617              | 0.13                    |
| Annuloplasty                                                                      | 3533       | 32            | 1,465               | 2.18                    |
| Thoracoscopic excision of lesion or tissue of lung                                | 3220       | 31            | 8,401               | 0.37                    |
| Pericardiotomy                                                                    | 3712       | 31            | 3,094               | 1                       |
| Other transplant of liver                                                         | 5059       | 31            | 2,095               | 1.48                    |
| Incision of vessel; upper limb vessels                                            | 3803       | 31            | 942                 | 3.29                    |
| Heart transplantation                                                             | 3751       | 31            | 882                 | 3.51                    |
| Open heart valvuloplasty of aortic valve without replacement                      | 3511       | 31            | 735                 | 4.22                    |
| Percutaneous angioplasty of intracranial vessel(s)                                | 0062       | 31            | 359                 | 8.64                    |
| Partial excision of pituitary gland, transsphenoidal approach                     | 0762       | 30            | 3,337               | 0.9                     |
| Amputation of toe                                                                 | 8411       | 29            | 15,130              | 0.19                    |
| Lumbar and lumbosacral fusion of the posterior column, posterior technique        | 8107       | 29            | 14,067              | 0.21                    |
| Other transurethral excision or destruction of lesion or tissue of bladder        | 5749       | 28            | 10,151              | 0.28                    |
| Exploratory laparotomy                                                            | 5411       | 28            | 4,374               | 0.64                    |
| Aorta-iliac-femoral bypass                                                        | 3925       | 28            | 2,399               | 1.17                    |
| Excision or destruction of other lesion or tissue of heart, open approach         | 3733       | 28            | 1,529               | 1.83                    |
| Other and unspecified total abdominal hysterectomy                                | 6849       | 27            | 69,139              | 0.04                    |

**Supplementary Table 3.** Continued

| Procedure name                                                           | ICD-9 code | No. of stroke | Procedure frequency | Incidence of stroke (%) |
|--------------------------------------------------------------------------|------------|---------------|---------------------|-------------------------|
| Insertion of implantable heart assist system                             | 3766       | 27            | 474                 | 5.7                     |
| Partial excision of pituitary gland, transfrontal approach               | 0761       | 25            | 246                 | 10.16                   |
| Laparoscopic right hemicolectomy                                         | 1733       | 24            | 10,009              | 0.24                    |
| Other repair of aneurysm                                                 | 3952       | 24            | 1,581               | 1.52                    |
| Lumbar and lumbosacral fusion of the anterior column, anterior technique | 8106       | 23            | 18,861              | 0.12                    |
| Total splenectomy                                                        | 415        | 23            | 4,123               | 0.56                    |
| Percutaneous balloon valvuloplasty                                       | 3596       | 23            | 1,095               | 2.1                     |
| Lobectomy of brain                                                       | 0153       | 23            | 585                 | 3.93                    |
| Ventricular shunt to extracranial site NEC                               | 239        | 23            | 407                 | 5.65                    |
| Laparoscopic appendectomy                                                | 4701       | 22            | 92,255              | 0.02                    |
| Revision of hip replacement, both acetabular and femoral components      | 0070       | 21            | 7,814               | 0.27                    |
| Other myectomy                                                           | 8345       | 21            | 5,416               | 0.39                    |
| Revision of arteriovenous shunt for renal dialysis                       | 3942       | 21            | 4,469               | 0.47                    |
| Other cervical fusion of the posterior column, posterior technique       | 8103       | 20            | 5,539               | 0.36                    |
| Amputation through foot                                                  | 8412       | 20            | 4,686               | 0.43                    |

ICD-9, International Classification of Diseases, 9th revision; NEC, not otherwise specified.
