# Supplementary material for: The Incidence of Perioperative Stroke: Estimate Using State and National Databases and Systematic Review
Source: PubMed Central journal article supplement — J Stroke. 2019 Sep 30;21(3):290–301. doi: 10.5853/jos.2019.00304 (PMC6780011; doi:10.5853/jos.2019.00304), 2019-09-30
Supplement: jos-2019-00304-suppl5.pdf [file jos-2019-00304-suppl5.pdf]

**Supplementary Table 4.** One hundred surgeries that had the highest incidence of perioperative stroke, with procedure frequency  $\geq 10$ 

| Procedure name                                                                            | ICD-9 code | Incidence of stroke (%) | Procedure frequency |
|-------------------------------------------------------------------------------------------|------------|-------------------------|---------------------|
| Implantation or insertion of biventricular external heart assist system                   | 3760       | 20                      | 15                  |
| Endovascular removal of obstruction from head and neck vessel(s)                          | 3974       | 18.47                   | 926                 |
| Incision of vessel; intracranial vessels                                                  | 3801       | 18.18                   | 11                  |
| Other excision of vessel; intracranial vessels                                            | 3861       | 17.5                    | 40                  |
| Percutaneous insertion of intracranial vascular stent(s)                                  | 0065       | 16.67                   | 12                  |
| Extracranial-intracranial vascular bypass                                                 | 3928       | 13.82                   | 434                 |
| Lobotomy and tractotomy                                                                   | 132        | 11.43                   | 35                  |
| Clipping of aneurysm                                                                      | 3951       | 10.29                   | 2,856               |
| Partial excision of pituitary gland, transfrontal approach                                | 0761       | 10.16                   | 246                 |
| Other removal or destruction of corneal lesion                                            | 1149       | 9.9                     | 11                  |
| Extracorporeal membrane oxygenation                                                       | 3965       | 8.74                    | 389                 |
| Percutaneous angioplasty of intracranial vessel(s)                                        | 0062       | 8.64                    | 359                 |
| Incision of vessel; abdominal veins                                                       | 3807       | 8                       | 25                  |
| Endovascular embolization or occlusion of vessel(s) of head or neck using bare coils      | 3975       | 7.8                     | 1,166               |
| Partial excision of pituitary gland, unspecified approach                                 | 0763       | 7.55                    | 53                  |
| Resection of vessel with anastomosis; intracranial vessels                                | 3831       | 7.14                    | 28                  |
| Other operations on pancreas                                                              | 5299       | 6.67                    | 15                  |
| Excision of uvula                                                                         | 2772       | 6.67                    | 15                  |
| Insertion of temporary non-implantable extracorporeal circulatory assist device           | 3762       | 6.6                     | 33                  |
| Resection of vessel with replacement; thoracic vessels                                    | 3845       | 6.54                    | 1,499               |
| Endovascular (total) embolization or occlusion of head and neck vessels                   | 3972       | 6.4                     | 4,174               |
| Adjunct vascular system; procedure on single vessel                                       | 0040       | 6.25                    | 32                  |
| Insertion of percutaneous external heart assist device                                    | 3764       | 6.25                    | 16                  |
| Incision of vessel; aorta                                                                 | 3804       | 6.15                    | 65                  |
| Endovascular embolization or occlusion of vessel(s) of head or neck using bioactive coils | 3976       | 5.9                     | 305                 |
| Insertion of implantable heart assist system                                              | 3766       | 5.7                     | 474                 |
| Ventricular shunt to extracranial site NEC                                                | 0239       | 5.65                    | 407                 |
| Transapical replacement of aortic valve                                                   | 3506       | 5.56                    | 18                  |
| Craniotomy and craniectomy; reopening of craniotomy site                                  | 0123       | 5.49                    | 328                 |
| Excision, destruction, or exclusion of left atrial appendage                              | 3736       | 5.41                    | 37                  |
| Other incision of brain                                                                   | 0139       | 5.25                    | 2,628               |
| Incision of vessel; other thoracic vessels                                                | 3805       | 4.9                     | 102                 |
| Total excision of pituitary gland, transfrontal approach                                  | 0764       | 4.76                    | 21                  |
| Other craniectomy                                                                         | 0125       | 4.56                    | 1,008               |
| Sphenoidectomy                                                                            | 2264       | 4.37                    | 183                 |
| Other excision of vessel; other thoracic vessels                                          | 3865       | 4.35                    | 23                  |
| Incision of multiple nasal sinuses                                                        | 2253       | 4.35                    | 23                  |
| Excision of lesion or tissue of cerebral meninges                                         | 0151       | 4.24                    | 4,549               |
| Open heart valvuloplasty of aortic valve without replacement                              | 3511       | 4.22                    | 735                 |
| Other extracapsular extraction of lens                                                    | 1359       | 4.17                    | 24                  |
| Aorta-subclavian-carotid bypass                                                           | 3922       | 4.12                    | 437                 |
| Lobectomy of brain                                                                        | 0153       | 3.93                    | 585                 |
| Division of thyroid isthmus                                                               | 0691       | 3.77                    | 53                  |
| Cardiotomy                                                                                | 3711       | 3.74                    | 107                 |

Supplementary Table 4. Continued

| Procedure name                                                               | ICD-9 code | Incidence of stroke (%) | Procedure frequency |
|------------------------------------------------------------------------------|------------|-------------------------|---------------------|
| Endovascular implantation of graft in thoracic aorta                         | 3973       | 3.7                     | 1,216               |
| Placement of intracerebral catheter(s) via burr hole(s)                      | 0128       | 3.63                    | 248                 |
| Heart transplantation                                                        | 3751       | 3.51                    | 882                 |
| Other intra-abdominal vascular shunt or bypass                               | 3926       | 3.49                    | 172                 |
| Intraoperative cardiac pacemaker                                             | 3964       | 3.45                    | 29                  |
| Other craniotomy                                                             | 0124       | 3.43                    | 3,030               |
| Open and other replacement of mitral valve with tissue graft                 | 3523       | 3.41                    | 2,783               |
| Sphenoidotomy                                                                | 2252       | 3.31                    | 121                 |
| Combined heart-lung transplantation                                          | 336        | 3.3                     | 33                  |
| Incision of vessel; upper limb vessels                                       | 3803       | 3.29                    | 942                 |
| Operations on carotid body, carotid sinus and other vascular bodies          | 398        | 3.28                    | 122                 |
| Incision of cerebral meninges                                                | 0131       | 3.27                    | 10,929              |
| Other excision or destruction of lesion or tissue of brain                   | 0159       | 3.23                    | 14,476              |
| Partial excision of pineal gland                                             | 0753       | 3.13                    | 64                  |
| Excision of accessory spleen                                                 | 4193       | 3.13                    | 32                  |
| Endovascular replacement of aortic valve                                     | 3505       | 2.94                    | 68                  |
| Total correction of transposition of great vessels, not elsewhere classified | 3584       | 2.94                    | 34                  |
| Incision of vessel; abdominal arteries                                       | 3806       | 2.93                    | 273                 |
| Percutaneous insertion of carotid artery stent(s)                            | 0063       | 2.91                    | 103                 |
| Incision of vessel; other vessels of head and neck                           | 3802       | 2.91                    | 103                 |
| Other surgical occlusion of vessels; other vessels of head and neck          | 3882       | 2.85                    | 281                 |
| Reopening of recent thoracotomy site                                         | 3403       | 2.78                    | 144                 |
| Transluminal coronary atherectomy                                            | 1755       | 2.78                    | 36                  |
| Ligation of thoracic duct                                                    | 4064       | 2.78                    | 36                  |
| Other repair of retinal detachment                                           | 1459       | 2.78                    | 36                  |
| Other surgical occlusion of vessels; intracranial vessels                    | 3881       | 2.73                    | 110                 |
| Control of epistaxis by ligation of ethmoidal arteries                       | 2104       | 2.7                     | 37                  |
| Repair of endocardial cushion defect with tissue graft                       | 3563       | 2.63                    | 114                 |
| Total ostectomy of other facial bone with synchronous reconstruction         | 7644       | 2.63                    | 38                  |
| Open ablation of renal lesion or tissue                                      | 5532       | 2.63                    | 38                  |
| Open and other replacement of aortic valve with tissue graft                 | 3521       | 2.61                    | 15,928              |
| Ventricular shunt to circulatory system                                      | 232        | 2.6                     | 77                  |
| Percutaneous angioplasty of extracranial vessel(s)                           | 0061       | 2.55                    | 4,312               |
| Trocar cholecystostomy                                                       | 5102       | 2.53                    | 79                  |
| Soave submucosal resection of rectum                                         | 4841       | 2.5                     | 40                  |
| Other operations on heart and pericardium                                    | 3799       | 2.44                    | 41                  |
| Open and other replacement of mitral valve                                   | 3524       | 2.43                    | 2,639               |
| Open and other replacement of pulmonary valve with tissue graft              | 3527       | 2.41                    | 166                 |
| Suture of peritoneum                                                         | 5464       | 2.38                    | 84                  |
| Other dental restoration                                                     | 2349       | 2.38                    | 42                  |
| Percutaneous mitral valve repair with implant                                | 3597       | 2.38                    | 42                  |
| Open and other replacement of aortic valve                                   | 3522       | 2.37                    | 8,633               |
| Creation of conduit between right ventricle and pulmonary artery             | 3592       | 2.34                    | 128                 |
| Other and unspecified repair of atrial septal defect                         | 3571       | 2.32                    | 518                 |

**Supplementary Table 4.** Continued

| Procedure name                                                           | ICD-9 code | Incidence of stroke (%) | Procedure frequency |
|--------------------------------------------------------------------------|------------|-------------------------|---------------------|
| Aorta-renal bypass                                                       | 3924       | 2.27                    | 44                  |
| Systemic to pulmonary artery shunt                                       | 390        | 2.26                    | 177                 |
| Isolation of segment of small intestine                                  | 4551       | 2.25                    | 89                  |
| Closed (aspiration, percutaneous) biopsy of spleen                       | 4132       | 2.22                    | 45                  |
| Incision of vessel; lower limb arteries                                  | 3808       | 2.19                    | 1,783               |
| Implant of pulsation balloon                                             | 3761       | 2.18                    | 6,913               |
| Annuloplasty                                                             | 3533       | 2.18                    | 1,465               |
| Other excision of vessel; other vessels of head and neck                 | 3862       | 2.17                    | 46                  |
| Percutaneous balloon valvuloplasty                                       | 3596       | 2.1                     | 1,095               |
| Incision of pituitary gland                                              | 0772       | 2.08                    | 48                  |
| Fat graft of skin and subcutaneous tissue                                | 8687       | 2.06                    | 97                  |
| Other division of bone; scapula, clavicle, and thorax (ribs and sternum) | 7731       | 2.04                    | 49                  |

ICD-9, International Classification of Diseases, 9th revision; NEC, not otherwise specified.
