# Supplementary material for: The Incidence of Perioperative Stroke: Estimate Using State and National Databases and Systematic Review
Source: PubMed Central journal article supplement — J Stroke. 2019 Sep 30;21(3):290–301. doi: 10.5853/jos.2019.00304 (PMC6780011; doi:10.5853/jos.2019.00304), 2019-09-30
Supplement: jos-2019-00304-suppl6.pdf [file jos-2019-00304-suppl6.pdf]

**Supplementary Table 5.** ICD-9 codes used in identifying perioperative strokes

| Type of stroke     | Diagnostic ICD-9 code                                              |
|--------------------|--------------------------------------------------------------------|
| Ischemic stroke    | 43301, 43311, 43321, 43331, 43381, 43391, 43401, 43411, 43491, 436 |
| Iatrogenic stroke  | 99702                                                              |
| Hemorrhagic stroke | 430, 431, 4329                                                     |

ICD-9, International Classification of Diseases, 9th revision.
