# Supplementary material for: The Incidence of Perioperative Stroke: Estimate Using State and National Databases and Systematic Review
Source: PubMed Central journal article supplement — J Stroke. 2019 Sep 30;21(3):290–301. doi: 10.5853/jos.2019.00304 (PMC6780011; doi:10.5853/jos.2019.00304), 2019-09-30
Supplement: jos-2019-00304-suppl7.pdf [file jos-2019-00304-suppl7.pdf]

**Supplementary Table 6.** Full list of the systematic review

| Author                             | Year | Surgical procedure                                   | Country        | Sample size | Stroke no. | Stroke incidence (%) |
|------------------------------------|------|------------------------------------------------------|----------------|-------------|------------|----------------------|
| Abbas et al. <sup>1</sup>          | 2015 | CABG                                                 | Pakistan       | 115         | 7          | 6.0                  |
| Aboyans et al. <sup>2</sup>        | 2008 | CABG                                                 | France         | 1,022       | 37         | 3.60                 |
| Abraham et al. <sup>3</sup>        | 2002 | Abdominal aortic aneurysm repair                     | United States  | 116         | 1          | 0.90                 |
| AbuRahma et al. <sup>4</sup>       | 1996 | CEA                                                  | United States  | 399         | 7          | 1.75                 |
| AbuRahma <sup>5</sup>              | 2004 | CEA                                                  | United States  | 357         | 10         | 2.80                 |
| AbuRahma et al. <sup>6</sup>       | 2008 | CAS                                                  | United States  | 100         | 2          | 2.0                  |
| AbuRahma et al. <sup>7</sup>       | 2010 | CEA                                                  | United States  | 200         | 2          | 1.0                  |
| AbuRahma et al. <sup>8</sup>       | 2010 | CEA and CAS                                          | United States  | 192         | 3          | 1.56                 |
| AbuRahma et al. <sup>9</sup>       | 2005 | CEA                                                  | United States  | 187         | 3          | 1.50                 |
| AbuRahma et al. <sup>10</sup>      | 2001 | CEA                                                  | United States  | 144         | 6          | 4.16                 |
| AbuRahma et al. <sup>11</sup>      | 2007 | CEA                                                  | United States  | 200         | 6          | 3.0                  |
| AbuRahma et al. <sup>12</sup>      | 2002 | CEA                                                  | United States  | 200         | 7          | 3.50                 |
| Ackerstaff et al. <sup>13</sup>    | 1996 | CEA                                                  | Netherlands    | 301         | 13         | 4.31                 |
| Ad et al. <sup>14</sup>            | 2011 | Cox-Maze procedure                                   | United States  | 124         | 1          | 0.8                  |
| Ad et al. <sup>15</sup>            | 2015 | Mitral valve surgery                                 | United States  | 387         | 3          | 0.76                 |
| Ad et al. <sup>16</sup>            | 2013 | Cox-Maze procedure                                   | United States  | 232         | 4          | 1.70                 |
| Ad et al. <sup>17</sup>            | 2017 | Cox-Maze procedure                                   | United States  | 709         | 4          | 0.56                 |
| Alcantara et al. <sup>18</sup>     | 2014 | CEA                                                  | United States  | 181         | 0          | 0                    |
| Alnasser et al. <sup>19</sup>      | 2017 | Transcatheter valve-in-valve implantation            | Canada         | 162         | 2          | 1.23                 |
| Alonso-Coello et al. <sup>20</sup> | 2017 | Noncardiac surgeries                                 | Multiple       | 8,346       | 60         | 0.72                 |
| Amato et al. <sup>21</sup>         | 2015 | CEA                                                  | Italy          | 202         | 3          | 1.49                 |
| Ambrosii et al. <sup>22</sup>      | 2016 | Musculoskeletal system or abdominal cavity surgeries | Moldova        | 400         | 2          | 0.50                 |
| Ansel et al. <sup>23</sup>         | 2010 | CAS                                                  | United States  | 257         | 5          | 1.90                 |
| Antunes et al. <sup>24</sup>       | 1999 | CABG                                                 | Portugal       | 107         | 3          | 2.8                  |
| Anzola et al. <sup>25</sup>        | 2004 | Patent foramen ovale transcatheter closure           | Italy          | 140         | 0          | 0                    |
| Arnaoutoglou et al. <sup>26</sup>  | 2017 | Endovascular repair of abdominal aortic aneurysm     | Greece         | 153         | 3          | 1.96                 |
| Aronson <sup>27</sup>              | 2009 | Cardiac surgery                                      | United States  | 1,405       | 20         | 1.42                 |
| Ascher et al. <sup>28</sup>        | 2002 | CEA                                                  | United States  | 226         | 3          | 1.30                 |
| Ascione et al. <sup>29</sup>       | 2004 | CABG                                                 | United Kingdom | 686         | 5          | 0.73                 |
| Ascione et al. <sup>30</sup>       | 2005 | CABG                                                 | United Kingdom | 470         | 6          | 1.27                 |
| Ascione et al. <sup>31</sup>       | 2001 | CABG                                                 | United Kingdom | 253         | 14         | 5.53                 |
| Ascione et al. <sup>32</sup>       | 2002 | CABG                                                 | United Kingdom | 4,077       | 45         | 1.10                 |
| Asimakopoulos et al. <sup>33</sup> | 2006 | Off pump CABG                                        | United Kingdom | 251         | 2          | 0.80                 |
| Assadian et al. <sup>34</sup>      | 2008 | CEA                                                  | Austria        | 338         | 2          | 0.60                 |
| Assadian et al. <sup>35</sup>      | 2007 | Carotid eversion endarterectomy                      | Austria        | 363         | 5          | 1.38                 |
| Assadian et al. <sup>36</sup>      | 2005 | CEA                                                  | Austria        | 1,210       | 30         | 2.48                 |
| Asteriou et al. <sup>37</sup>      | 2013 | CABG                                                 | Greece         | 200         | 6          | 3.0                  |
| Avinee et al. <sup>38</sup>        | 2016 | TAVI                                                 | France         | 368         | 14         | 3.80                 |
| Axisa et al. <sup>39</sup>         | 2002 | Peripheral angioplasty                               | United Kingdom | 1,377       | 6          | 0.44                 |
| Ayad <sup>40</sup>                 | 2016 | Percutaneous coronary intervention                   | Egypt          | 160         | 0          | 0                    |
| Baklanov et al. <sup>41</sup>      | 2006 | Coronary stenting                                    | United States  | 197         | 0          | 0                    |
| Ballotta et al. <sup>42</sup>      | 2008 | CEA                                                  | Italy          | 102         | 0          | 0                    |
| Ballotta et al. <sup>43</sup>      | 2005 | Carotid coiling or kinking                           | Italy          | 129         | 0          | 0                    |
| Ballotta et al. <sup>44</sup>      | 2008 | CEA                                                  | Italy          | 374         | 0          | 0                    |

Supplementary Table 6 . Continued

| Author                           | Year | Surgical procedure                                                                                                                      | Country        | Sample size | Stroke no. | Stroke incidence (%) |
|----------------------------------|------|-----------------------------------------------------------------------------------------------------------------------------------------|----------------|-------------|------------|----------------------|
| Ballotta et al. <sup>45</sup>    | 2004 | CEA                                                                                                                                     | Italy          | 363         | 3          | 0.77                 |
| Ballotta et al. <sup>46</sup>    | 2003 | CEA                                                                                                                                     | Italy          | 624         | 4          | 0.64                 |
| Ballotta et al. <sup>47</sup>    | 1999 | CEA                                                                                                                                     | Italy          | 336         | 5          | 1.49                 |
| Ballotta et al. <sup>48</sup>    | 2001 | CEA                                                                                                                                     | Italy          | 547         | 5          | 0.91                 |
| Ballotta et al. <sup>49</sup>    | 2014 | CEA                                                                                                                                     | Italy          | 1,773       | 8          | 0.39                 |
| Banach et al. <sup>50</sup>      | 2008 | Open heart surgery                                                                                                                      | Poland         | 260         | 5          | 1.92                 |
| Baracchini et al. <sup>51</sup>  | 2012 | eCEA                                                                                                                                    | Italy          | 1,294       | 8          | 0.55                 |
| Bardia et al. <sup>52</sup>      | 2017 | Isolated cardiac surgery                                                                                                                | United States  | 763         | 23         | 3.01                 |
| Baribeau et al. <sup>53</sup>    | 2002 | Open heart surgery                                                                                                                      | United States  | 228         | 16         | 7.01                 |
| Barnes et al. <sup>54</sup>      | 1981 | Coronary or peripheral arterial revascularization                                                                                       | United States  | 314         | 1          | 0.32                 |
| Barnes et al. <sup>55</sup>      | 1981 | Coronary or peripheral arterial revascularization                                                                                       | United States  | 449         | 5          | 1.11                 |
| Basic et al. <sup>56</sup>       | 2016 | CEA                                                                                                                                     | Austria        | 485         | 6          | 1.24                 |
| Bastounis et al. <sup>57</sup>   | 2001 | CEA                                                                                                                                     | Greece         | 337         | 0          | 0                    |
| Batchelder et al. <sup>58</sup>  | 2015 | CEA                                                                                                                                     | United Kingdom | 100         | 1          | 1.0                  |
| Bechtel et al. <sup>59</sup>     | 2000 | CEA and abdominal aortic surgery                                                                                                        | Germany        | 201         | 1          | 0.50                 |
| Becquemin et al. <sup>60</sup>   | 2003 | Carotid stenting and carotid surgery                                                                                                    | France         | 455         | 9          | 1.98                 |
| Bellomo et al. <sup>61</sup>     | 2002 | All patients undergoing surgeries with a hospital stay more than 48 hr                                                                  | Australia      | 1,125       | 16         | 1.20                 |
| Bellomo et al. <sup>62</sup>     | 2004 | Various surgical procedures with a hospital stay more than 48 hr                                                                        | Australia      | 2,183       | 23         | 1.05                 |
| Berens et al. <sup>63</sup>      | 1992 | Cardiac surgery                                                                                                                         | United States  | 1,087       | 22         | 2.02                 |
| Bernhardt et al. <sup>64</sup>   | 2015 | Orthotopic liver transplant                                                                                                             | Germany        | 134         | 1          | 0.70                 |
| Bertolini et al. <sup>65</sup>   | 1997 | Myocardial revascularization                                                                                                            | Italy          | 100         | 3          | 3.0                  |
| Berwanger et al. <sup>66</sup>   | 2016 | Patients undergoing noncardiac surgeries in patients >45 with an overnight hospital stay                                                | Multiple       | 22,815      | 123        | 0.54                 |
| Bilecen et al. <sup>67</sup>     | 2013 | Complex cardiac surgery                                                                                                                 | Netherlands    | 1,075       | 31         | 2.88                 |
| Bilfinger et al. <sup>68</sup>   | 2000 | Complex cardiac surgery                                                                                                                 | United States  | 1,987       | 38         | 1.8                  |
| Binder et al. <sup>69</sup>      | 2015 | TAVI                                                                                                                                    | Switzerland    | 598         | 18         | 3.01                 |
| Birincioglu et al. <sup>70</sup> | 1999 | CABG                                                                                                                                    | Turkey         | 722         | 13         | 1.80                 |
| Bishu et al. <sup>71</sup>       | 2014 | TAVR                                                                                                                                    | United States  | 277         | 2          | 0.72                 |
| Boehm et al. <sup>72</sup>       | 2007 | CABG                                                                                                                                    | Germany        | 1,447       | 35         | 2.41                 |
| Börgermann et al. <sup>73</sup>  | 2013 | Aortic valve replacement                                                                                                                | Germany        | 808         | 9          | 1.11                 |
| Borst et al. <sup>74</sup>       | 2007 | CEA                                                                                                                                     | Netherlands    | 102         | 1          | 0.98                 |
| Borst et al. <sup>75</sup>       | 2001 | CEA                                                                                                                                     | Netherlands    | 599         | 20         | 3.34                 |
| Borstad et al. <sup>76</sup>     | 1992 | Patients undergoing major gynecological surgery, laproto-my, vaginal repair, colposuspension. In procedures lasting more than a 30-min. | Norway         | 141         | 1          | 0.71                 |
| Boudriot et al. <sup>77</sup>    | 2011 | CABG and sirolimus-eluting stenting                                                                                                     | Germany        | 201         | 2          | 0.99                 |
| Bourke et al. <sup>78</sup>      | 2002 | CEA                                                                                                                                     | Australia      | 146         | 0          | 0                    |
| Braun et al. <sup>79</sup>       | 2002 | Transcatheter closure of patent foramen ovale                                                                                           | Germany        | 276         | 0          | 0                    |
| Breuer et al. <sup>80</sup>      | 1983 | CABG                                                                                                                                    | United States  | 421         | 22         | 5.22                 |
| Brittenden et al. <sup>81</sup>  | 2000 | CEA                                                                                                                                     | Scotland       | 226         | 6          | 2.65                 |
| Broască et al. <sup>82</sup>     | 2013 | lower limb revascularization                                                                                                            | Romania        | 231         | 0          | 0                    |
| Brosig et al. <sup>83</sup>      | 2008 | CEA                                                                                                                                     | Germany        | 164         | 12         | 7.31                 |
| Budera et al. <sup>84</sup>      | 2012 | Valve and/or coronary surgery                                                                                                           | Czech Republic | 224         | 6          | 2.68                 |

Supplementary Table 6 . Continued

| Author                           | Year | Surgical procedure                                           | Country        | Sample size | Stroke no. | Stroke incidence (%) |
|----------------------------------|------|--------------------------------------------------------------|----------------|-------------|------------|----------------------|
| Bull et al. <sup>85</sup>        | 1993 | CABG                                                         | Canada         | 245         | 5          | 2.04                 |
| Camous et al. <sup>86</sup>      | 2014 | Pulmonary endarterectomy                                     | France         | 207         | 3          | 1.45                 |
| Canaud et al. <sup>87</sup>      | 2011 | Thoracic endovascular aortic repair                          | France         | 186         | 0          | 0                    |
| Cao et al. <sup>88</sup>         | 1997 | CEA                                                          | Italy          | 469         | 15         | 2.91                 |
| Cao et al. <sup>89</sup>         | 2000 | CEA                                                          | Italy          | 1,353       | 28         | 2.07                 |
| Carrier et al. <sup>90</sup>     | 1997 | CABG                                                         | Canada         | 224         | 3          | 1.34                 |
| Castriota et al. <sup>91</sup>   | 2008 | CAS with cardiopulmonary bypass                              | Italy          | 178         | 1          | 0.56                 |
| Chen et al. <sup>92</sup>        | 2009 | Cardiac surgery with cardiopulmonary bypass                  | United States  | 122         | 6          | 4.92                 |
| Cieri et al. <sup>93</sup>       | 2008 | CAS                                                          | Italy          | 223         | 7          | 3.14                 |
| Cimochowski et al. <sup>94</sup> | 1997 | CABG                                                         | United States  | 111         | 1          | 0.90                 |
| Cohen et al. <sup>95</sup>       | 1998 | Valve and/or coronary surgery                                | Canada         | 115         | 2          | 1.74                 |
| Cooper et al. <sup>96</sup>      | 2013 | Anaortic off-pump CABG                                       | Australia      | 1,135       | 5          | 0.44                 |
| Coscas et al. <sup>97</sup>      | 2010 | Open surgery for carotid stenosis                            | France         | 119         | 3          | 2.52                 |
| Crouch et al. <sup>98</sup>      | 2015 | TAVI                                                         | Australia      | 114         | 3          | 2.63                 |
| Da Col et al. <sup>99</sup>      | 2008 | Myocardial revascularization                                 | Italy          | 257         | 1          | 0.39                 |
| Da Silva et al. <sup>100</sup>   | 1996 | CEA                                                          | United Kingdom | 108         | 4          | 3.70                 |
| Dake et al. <sup>101</sup>       | 1998 | Endovascular repair of descending aortic aneurysm            | United States  | 103         | 7          | 6.80                 |
| D'Angelo et al. <sup>102</sup>   | 2001 | CEA                                                          | Italy          | 100         | 1          | 1                    |
| Darling et al. <sup>103</sup>    | 1998 | CEA                                                          | United States  | 470         | 5          | 1.06                 |
| Darwazah et al. <sup>104</sup>   | 2010 | Myocardial revascularization                                 | Israel         | 350         | 0          | 0                    |
| M.Davies et al. <sup>105</sup>   | 1993 | CEA                                                          | Australia      | 389         | 10         | 2.57                 |
| J.Davies et al. <sup>106</sup>   | 2016 | SAVR or TAVR                                                 | United States  | 573         | 11         | 1.92                 |
| De Santis et al. <sup>107</sup>  | 2016 | Carotid surgery                                              | Italy          | 285         | 4          | 1.28                 |
| Debing et al. <sup>108</sup>     | 2007 | CEA                                                          | Belgium        | 742         | 16         | 2.16                 |
| Debing et al. <sup>109</sup>     | 2011 | CEA                                                          | Belgium        | 1,351       | 18         | 1.33                 |
| Deiwick et al. <sup>110</sup>    | 1997 | Open heart surgery                                           | Germany        | 101         | 14         | 13.86                |
| Deng et al. <sup>111</sup>       | 2006 | Coronary revascularization                                   | China          | 179         | 1          | 0.60                 |
| Detter et al. <sup>112</sup>     | 2002 | CABG                                                         | Germany        | 340         | 0          | 0                    |
| Devereaux et al. <sup>113</sup>  | 2011 | Noncardiac surgeries in patients older than 45 yr            | Multiple       | 432         | 1          | 0.23                 |
| Di Biase et al. <sup>114</sup>   | 2014 | Catheter ablation of atrial fibrillation with radiofrequency | Multiple       | 428         | 2          | 0.47                 |
| Didier et al. <sup>115</sup>     | 2016 | CEA                                                          | United States  | 25,626      | 86         | 0.34                 |
| Dinkel et al. <sup>116</sup>     | 1992 | Carotid surgery                                              | Germany        | 125         | 0          | 0                    |
| Donaldson et al. <sup>117</sup>  | 1993 | CEA                                                          | United States  | 396         | 1          | 0.22                 |
| Dong et al. <sup>118</sup>       | 2016 | CAS                                                          | China          | 154         | 9          | 5.84                 |
| Dong et al. <sup>119</sup>       | 2017 | CAS                                                          | China          | 358         | 10         | 2.79                 |
| Dorigo et al. <sup>120</sup>     | 2009 | CEA                                                          | Italy          | 3,324       | 19         | 0.47                 |
| Lam et al. <sup>121</sup>        | 2007 | CAS                                                          | United States  | 133         | 4          | 2.96                 |
| Larsen et al. <sup>122</sup>     | 1988 | Noncardiac noncarotid surgeries                              | Denmark        | 2,463       | 6          | 0.20                 |
| Lee et al. <sup>123</sup>        | 2013 | CABG                                                         | Multiple       | 541         | 18         | 3.33                 |
| Lennard et al. <sup>124</sup>    | 1999 | CEA                                                          | United Kingdom | 252         | 4          | 1.59                 |
| Liapis et al. <sup>125</sup>     | 2001 | CEA                                                          | Greece         | 308         | 7          | 2.07                 |
| Likosky et al. <sup>126</sup>    | 2003 | CABG                                                         | United States  | 11,825      | 177        | 0.99                 |
| Linden et al. <sup>127</sup>     | 2007 | Coronary revascularization                                   | United States  | 611         | 39         | 6.38                 |
| Loponen et al. <sup>128</sup>    | 2003 | CABG                                                         | Finland        | 1,318       | 34         | 2.58                 |

Supplementary Table 6 . Continued

| Author                            | Year | Surgical procedure                                                                 | Country        | Sample size | Stroke no. | Stroke incidence (%) |
|-----------------------------------|------|------------------------------------------------------------------------------------|----------------|-------------|------------|----------------------|
| Love et al. <sup>129</sup>        | 2000 | CEA                                                                                | Australia      | 443         | 8          | 1.80                 |
| Lübke et al. <sup>130</sup>       | 2015 | CEA                                                                                | Germany        | 1,880       | 28         | 1.49                 |
| MacDonald et al. <sup>131</sup>   | 1998 | CABG                                                                               | Canada         | 100         | 6          | 6                    |
| Mandeville et al. <sup>132</sup>  | 2015 | Bifurcation resection and interposition of a polytetrafluoroethylene graft and CEA | Belgium        | 153         | 4          | 2.61                 |
| Mattos et al. <sup>133</sup>      | 1992 | CEA                                                                                | United States  | 478         | 16         | 2.94                 |
| McCollum et al. <sup>134</sup>    | 1997 | Carotid surgery                                                                    | Multiple       | 709         | 15         | 2.11                 |
| McKhann et al. <sup>135</sup>     | 2002 | CABG                                                                               | United States  | 2,711       | 72         | 2.66                 |
| Mitchell et al. <sup>136</sup>    | 1999 | Thoracic endovascular aortic repair                                                | United States  | 103         | 7          | 6.80                 |
| Mukerji et al. <sup>137</sup>     | 2015 | CEA                                                                                | United Kingdom | 728         | 17         | 2.33                 |
| Mullenix et al. <sup>138</sup>    | 2002 | CEA                                                                                | United States  | 267         | 6          | 2.24                 |
| Naylor et al. <sup>139</sup>      | 2000 | CEA                                                                                | United Kingdom | 500         | 4          | 0.80                 |
| Newman et al. <sup>140</sup>      | 1996 | CABG                                                                               | United States  | 2,417       | 68         | 3.20                 |
| Nicholls et al. <sup>141</sup>    | 1985 | CEA                                                                                | United States  | 134         | 2          | 1.49                 |
| Nordanstig et al. <sup>142</sup>  | 2017 | CEA                                                                                | Sweden         | 418         | 11         | 2.63                 |
| Ott et al. <sup>143</sup>         | 1980 | CEA                                                                                | United States  | 240         | 4          | 1.29                 |
| Pell et al. <sup>144</sup>        | 2004 | CEA                                                                                | Scotland       | 877         | 22         | 2.51                 |
| Radu et al. <sup>145</sup>        | 2013 | CAS                                                                                | Germany        | 279         | 6          | 2.15                 |
| Rafiq et al. <sup>146</sup>       | 2012 | CABG                                                                               | Denmark        | 194         | 10         | 3.09                 |
| Roach et al. <sup>147</sup>       | 1996 | CABG                                                                               | United States  | 2,108       | 63         | 2.99                 |
| Saini et al. <sup>148</sup>       | 2017 | Minimally invasive surgical ablation for atrial fibrillation                       | United States  | 109         | 1          | 0.92                 |
| Salazar et al. <sup>149</sup>     | 2001 | Cardiac surgery                                                                    | United States  | 5,971       | 214        | 3.58                 |
| Salem et al. <sup>150</sup>       | 2011 | CEA                                                                                | United Kingdom | 109         | 2          | 1.83                 |
| Samson et al. <sup>151</sup>      | 1998 | CEA                                                                                | United States  | 654         | 11         | 1.68                 |
| Sandison et al. <sup>152</sup>    | 2000 | CEA                                                                                | United Kingdom | 333         | 8          | 2.40                 |
| Santo et al. <sup>153</sup>       | 2008 | Cardiac surgery                                                                    | Italy          | 925         | 9          | 0.97                 |
| Schmitz et al. <sup>154</sup>     | 2003 | Cardiac surgery                                                                    | Germany        | 582         | 8          | 1.37                 |
| Schneider et al. <sup>155</sup>   | 1997 | CEA                                                                                | United States  | 186         | 7          | 3.48                 |
| Schoenefeld et al. <sup>156</sup> | 2012 | CEA                                                                                | Germany        | 540         | 19         | 3.52                 |
| Schoof et al. <sup>157</sup>      | 2007 | CABG and/or valve surgery                                                          | Germany        | 2,797       | 67         | 2.40                 |
| Senay et al. <sup>158</sup>       | 2011 | CABG                                                                               | Turkey         | 3,248       | 32         | 0.99                 |
| Shapira et al. <sup>159</sup>     | 2006 | CABG                                                                               | United States  | 2,450       | 28         | 1.14                 |
| Shaw et al. <sup>160</sup>        | 1985 | CABG                                                                               | United Kingdom | 312         | 15         | 4.81                 |
| Spes et al. <sup>161</sup>        | 2007 | CAS                                                                                | Germany        | 371         | 9          | 2.22                 |
| Stabile et al. <sup>162</sup>     | 2010 | CAS                                                                                | Italy          | 1,300       | 12         | 0.92                 |
| Subban et al. <sup>163</sup>      | 2016 | TAVI                                                                               | Australia      | 209         | 9          | 4.31                 |
| Suematsu et al. <sup>164</sup>    | 2000 | CABG                                                                               | Japan          | 179         | 6          | 3.35                 |
| Takach et al. <sup>165</sup>      | 1996 | CEA                                                                                | United States  | 248         | 2          | 0.75                 |
| Tatoulis et al. <sup>166</sup>    | 1999 | Coronary revascularization                                                         | Australia      | 3,220       | 26         | 0.81                 |
| Trehan et al. <sup>167</sup>      | 1997 | CABG                                                                               | India          | 792         | 6          | 0.76                 |
| Trehan et al. <sup>168</sup>      | 2000 | CABG                                                                               | India          | 3,660       | 35         | 0.96                 |
| Verhoeven et al. <sup>169</sup>   | 2005 | CEA                                                                                | Netherlands    | 200         | 11         | 5.47                 |
| Veselka et al. <sup>170</sup>     | 2009 | CAS                                                                                | Czech Republic | 176         | 2          | 0.93                 |
| Walker et al. <sup>171</sup>      | 1995 | CEA                                                                                | Multiple       | 825         | 15         | 1.82                 |
| Walkes et al. <sup>172</sup>      | 2002 | CABG                                                                               | United States  | 1,069       | 31         | 2.90                 |

**Supplementary Table 6**. Continued

| Author                          | Year | Surgical procedure                               | Country       | Sample size | Stroke no. | Stroke incidence (%) |
|---------------------------------|------|--------------------------------------------------|---------------|-------------|------------|----------------------|
| Weimar et al. <sup>173</sup>    | 2012 | Cox-Maze procedure                               | United States | 212         | 2          | 0.94                 |
| Weinstein <sup>174</sup>        | 2001 | CABG                                             | United States | 2,217       | 51         | 2.30                 |
| Wenaweser et al. <sup>175</sup> | 2011 | TAVI                                             | Switzerland   | 256         | 9          | 3.52                 |
| Burns et al. <sup>176</sup>     | 1991 | CEA                                              | Australia     | 223         | 14         | 5.86                 |
| Wöhrle et al. <sup>177</sup>    | 2016 | TAVI                                             | Germany       | 235         | 5          | 2.13                 |
| Woelfle et al. <sup>178</sup>   | 2002 | CEA                                              | Germany       | 111         | 3          | 2.70                 |
| Wolman et al. <sup>179</sup>    | 1999 | Cardiac and coronary surgery                     | United States | 273         | 21         | 7.69                 |
| Wong et al. <sup>180</sup>      | 1999 | CEA                                              | Canada        | 184         | 8          | 4.35                 |
| Yadeau et al. <sup>181</sup>    | 2011 | Ambulatory shoulder surgery                      | United States | 1,169       | 0          | 0                    |
| Young et al. <sup>182</sup>     | 1996 | CEA                                              | United States | 721         | 10         | 1.39                 |
| Zannetti et al. <sup>183</sup>  | 1999 | CEA                                              | Italy         | 1,305       | 13         | 1.00                 |
| Zarins et al. <sup>184</sup>    | 2009 | CEA and CAS                                      | United States | 397         | 12         | 3.02                 |
| Zhang et al. <sup>185</sup>     | 2015 | Aortic valve replacement                         | Germany       | 113         | 1          | 0.88                 |
| Ziemann et al. <sup>186</sup>   | 2017 | Cardiac surgery                                  | Germany       | 983         | 14         | 1.42                 |
| Zipfel et al. <sup>187</sup>    | 2008 | Endovascular repair of abdominal aortic aneurysm | Germany       | 126         | 4          | 3.17                 |

CABG, coronary artery bypass grafting; CEA, carotid endarterectomy; CAS, carotid artery stenting; eCEA, eversion carotid endarterectomy; TAVI, transcatheter aortic valve implantation; TAVR, transcatheter aortic valve replacement; SAVR, surgical aortic valve replacement.
