# Supplementary material for: The Incidence of Perioperative Stroke: Estimate Using State and National Databases and Systematic Review
Source: PubMed Central journal article supplement — J Stroke. 2019 Sep 30;21(3):290–301. doi: 10.5853/jos.2019.00304 (PMC6780011; doi:10.5853/jos.2019.00304), 2019-09-30
Supplement: jos-2019-00304-suppl8.pdf [file jos-2019-00304-suppl8.pdf]

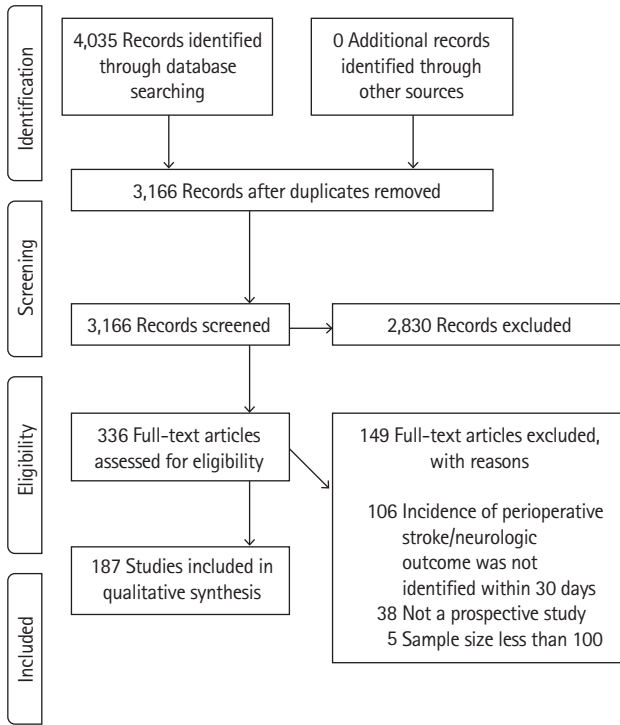

**Supplementary Figure 1.** PRISMA 2009 flow diagram. Adapted from Moher et al.<sup>188</sup> PRISMA, Preferred Reporting Items for Systematic Reviews and Meta-Analyses.
