# Supplementary material for: The Incidence of Perioperative Stroke: Estimate Using State and National Databases and Systematic Review
Source: PubMed Central journal article supplement — J Stroke. 2019 Sep 30;21(3):290–301. doi: 10.5853/jos.2019.00304 (PMC6780011; doi:10.5853/jos.2019.00304), 2019-09-30
Supplement: jos-2019-00304-suppl9.pdf [file jos-2019-00304-suppl9.pdf]

## Supplementary References

1. Abbas S, Riaz W, Khwaja IA, Iqbal M, Tufail Z, Waheed A. Mean arterial pressure and pulse pressure, influence on postoperative renal and neurological outcomes in elderly patients undergoing coronary revascularization. *Pak Heart J* 2015;48:194-199.
2. Aboyans V, Frank M, Nubret K, Lacroix P, Laskar M. Heart rate and pulse pressure at rest are major prognostic markers of early postoperative complications after coronary bypass surgery. *Eur J Cardiothorac Surg* 2008;33:971-976.
3. Abraham CZ, Chuter TA, Reilly LM, Okuhn SP, Pethan LK, Kerlan RB, et al. Abdominal aortic aneurysm repair with the Zenith stent graft: short to midterm results. *J Vasc Surg* 2002;36:217-225.
4. AbuRahma AF, Khan JH, Robinson PA, Saiedy S, Short YS, Bolland JP, et al. Prospective randomized trial of carotid endarterectomy with primary closure and patch angioplasty with saphenous vein, jugular vein, and polytetrafluoroethylene: perioperative (30-day) results. *J Vasc Surg* 1996;24:998-1007.
5. Aburahma AF. Patch closure improves results with carotid endarterectomy. *Semin Vasc Surg* 2004;17:243-252.
6. AbuRahma AF, Bates MC, Eads K, Armistead L, Flaherty SK. Safety and efficacy of carotid angioplasty/stenting in 100 consecutive high surgical risk patients: immediate and long-term follow-up. *Vasc Endovascular Surg* 2008;42:433-439.
7. Aburahma AF, Stone PA, Hass SM, Dean LS, Habib J, Keiffer T, et al. Prospective randomized trial of routine versus selective shunting in carotid endarterectomy based on stump pressure. *J Vasc Surg* 2010;51:1133-1138.
8. AbuRahma AF, Abu-Halimah S, Hass SM, Nanjundappa A, Stone PA, Mousa A, et al. Carotid artery stenting outcomes are equivalent to carotid endarterectomy outcomes for patients with post-carotid endarterectomy stenosis. *J Vasc Surg* 2010;52:1180-1187.
9. AbuRahma AF, Stone PA, Welch CA, Hofeldt MJ, Hass SM, Perry W. Prospective study of carotid endarterectomy with modified polytetrafluoroethylene (ACUSEAL) patching: early and late results. *J Vasc Surg* 2005;41:789-793.
10. AbuRahma AF, Robinson PA, Hannay RS, Hudson J, Cutlip L. Prospective controlled study of carotid endarterectomy with hemashield patch: is it thrombogenic? *Vasc Surg* 2001;35:167-174.
11. AbuRahma AF, Stone PA, Flaherty SK, AbuRahma Z. Prospective randomized trial of ACUSEAL (Gore-Tex) versus Hemashield-Finesse patching during carotid endarterectomy: early results. *J Vasc Surg* 2007;45:881-884.
12. AbuRahma AF, Hannay RS, Khan JH, Robinson PA, Hudson JK, Davis EA. Prospective randomized study of carotid endarterectomy with polytetrafluoroethylene versus collagen-impregnated Dacron (Hemashield) patching: perioperative (30-day) results. *J Vasc Surg* 2002;35:125-130.
13. Aackerstaff RG, Jansen C, Moll FL. Carotid endarterectomy and intraoperative emboli detection: correlation of clinical, transcranial Doppler, and magnetic resonance findings. *Echocardiography* 1996;13:543-550.
14. Ad N, Henry L, Hunt S. The concomitant cryosurgical Cox-Maze procedure using Argon based cryoprobes: 12 month results. *J Cardiovasc Surg (Torino)* 2011;52:593-599.
15. Ad N, Holmes SD, Shuman DJ, Pritchard G, Massimiano PS. Minimally invasive mitral valve surgery without aortic cross-clamping and with femoral cannulation is not associated with increased risk of stroke compared with traditional mitral valve surgery: a propensity score-matched analysis. *Eur J Cardiothorac Surg* 2015;48:868-872.
16. Ad N, Holmes SD, Massimiano PS, Pritchard G, Stone LE, Henry L. The effect of the Cox-maze procedure for atrial fibrillation concomitant to mitral and tricuspid valve surgery. *J Thorac Cardiovasc Surg* 2013;146:1426-1435.
17. Ad N, Holmes SD, Rongione AJ, Massimiano PS, Fornaresio LM. Does surgical ablation energy source affect long-term success of the concomitant Cox Maze procedure? *Ann Thorac Surg* 2017;104:29-35.
18. Alcantara SD, Wuamett JC, Lantis JC 2nd, Ulkatan S, Bamberger P, Mendes D, et al. Outcomes of combined somatosensory evoked potential, motor evoked potential, and electroencephalography monitoring during carotid endarterectomy. *Ann Vasc Surg* 2014;28:665-672.
19. Alnasser S, Cheema AN, Simonato M, Barbanti M, Edwards J, Kornowski R, et al. Matched comparison of self-expanding transcatheter heart valves for the treatment of failed aortic surgical bioprosthesis: insights from the Valve-in-Valve International Data Registry (VIVID). *Circ Cardiovasc Interv* 2017;10:e004392.
20. Alonso-Coello P, Cook D, Xu SC, Sigamani A, Berwanger O, Sivakumaran S, et al. Predictors, prognosis, and management of new clinically important atrial fibrillation after noncardiac surgery: a prospective cohort study. *Anesth Analg* 2017;125:162-169.
21. Amato B, Compagna R, Amato M, Gallelli L, de Franciscis S, Serra R. Aterofiol(®) in carotid plaque evolution. *Drug Des Devel Ther* 2015;9:3877-3884.
22. Ambrosii T, Şandru S, Belii A. The prevalence of perioperative complications in patients with and without obstructive sleep apnoea: a prospective cohort study. *Rom J Anaesth Intensive Care* 2016;23:103-110.

23. Ansel GM, Hopkins LN, Jaff MR, Rubino P, Bacharach JM, Scheinert D, et al. Safety and effectiveness of the INVATEC MO.MA proximal cerebral protection device during carotid artery stenting: results from the ARMOUR pivotal trial. *Catheter Cardiovasc Interv* 2010;76:1-8.
24. Antunes PE, Ferrão de Oliveira J, Antunes MJ. Non-cardioplegic coronary surgery in patients with severe left ventricular dysfunction. *Eur J Cardiothorac Surg* 1999;16:331-336.
25. Anzola GP, Morandi E, Casilli F, Onorato E. Does transcatheter closure of patent foramen ovale really "shut the door?": a prospective study with transcranial Doppler. *Stroke* 2004;35:2140-2144.
26. Arnaoutoglou E, Kouvelos G, Tzimas P, Laou E, Bouris V, Papadopoulos G, et al. Relationship between normal preoperative white blood cell count and major adverse events after endovascular repair for abdominal aortic aneurysm: results of a pilot study. *J Clin Anesth* 2017;36:201-205.
27. Aronson S. Clevidipine in the treatment of perioperative hypertension: assessing safety events in the ECLIPSE trials. *Expert Rev Cardiovasc Ther* 2009;7:465-472.
28. Ascher E, Markevich N, Hingorani AP, Kallakuri S, Gunduz Y. Internal carotid artery flow volume measurement and other intraoperative duplex scanning parameters as predictors of stroke after carotid endarterectomy. *J Vasc Surg* 2002;35:439-444.
29. Ascione R, Reeves BC, Pano M, Angelini GD. Trainees operating on high-risk patients without cardiopulmonary bypass: a high-risk strategy? *Ann Thorac Surg* 2004;78:26-33.
30. Ascione R, Ghosh A, Rogers CA, Cohen A, Monk C, Angelini GD. In-hospital patients exposed to clopidogrel before coronary artery bypass graft surgery: a word of caution. *Ann Thorac Surg* 2005;79:1210-1216.
31. Ascione R, Nason G, Al-Ruzzeh S, Ko C, Ciulli F, Angelini GD. Coronary revascularization with or without cardiopulmonary bypass in patients with preoperative nondialysis-dependent renal insufficiency. *Ann Thorac Surg* 2001;72:2020-2025.
32. Ascione R, Reeves BC, Chamberlain MH, Ghosh AK, Lim KH, Angelini GD. Predictors of stroke in the modern era of coronary artery bypass grafting: a case control study. *Ann Thorac Surg* 2002;74:474-480.
33. Asimakopoulos G, Karagounis AP, Valencia O, Rose D, Niranjana G, Chandrasekaran V. How safe is it to train residents to perform off-pump coronary artery bypass surgery? *Ann Thorac Surg* 2006;81:568-572.
34. Assadian A, Knöbl P, Hübl W, Senekowitsch C, Klingler A, Pfaffelmeyer N, et al. Safety and efficacy of intravenous enoxaparin for carotid endarterectomy: a prospective randomized pilot trial. *J Vasc Surg* 2008;47:537-542.
35. Assadian A, Rotter R, Assadian O, Senekowitsch C, Hagemüller GW, Hübl W. Homocysteine and early re-stenosis after carotid eversion endarterectomy. *Eur J Vasc Endovasc Surg* 2007;33:144-148.
36. Assadian A, Senekowitsch C, Assadian O, Ptakovsky H, Hagemüller GW. Perioperative morbidity and mortality of carotid artery surgery under loco-regional anaesthesia. *Vasa* 2005;34:41-45.
37. Asteriou C, Antonitsis P, Argiriadou H, Deliopoulos A, Konstantinou D, Foroulis C, et al. Minimal extracorporeal circulation reduces the incidence of postoperative major adverse events after elective coronary artery bypass grafting in high-risk patients: a single-institutional prospective randomized study. *Perfusion* 2013;28:350-356.
38. Avinée G, Durand E, Elhatimi S, Bauer F, Glinel B, Dacher JN, et al. Trends over the past 4 years in population characteristics, 30-day outcomes and 1-year survival in patients treated with transcatheter aortic valve implantation. *Arch Cardiovasc Dis* 2016;109:457-464.
39. Axisa B, Fishwick G, Bolia A, Thompson MM, London NJ, Bell PR, et al. Complications following peripheral angioplasty. *Ann R Coll Surg Engl* 2002;84:39-42.
40. Ayad SW. Aspiration versus no aspiration during primary PCI for ST-segment elevation myocardial infarction. *Egypt Hear t J* 2016;68:147-152.
41. Baklanov DV, Marcu CB, Juhasz DF, Caracciolo EA, Chawarski MC, Donohue TJ. Coronary stenting is safe and effective in a high-risk octogenarian patient cohort. *Conn Med* 2006;70:15-19.
42. Ballotta E, Meneghetti G, Da Giau G, Manara R, Saladini M, Baracchini C. Carotid endarterectomy within 2 weeks of minor ischemic stroke: a prospective study. *J Vasc Surg* 2008;48:595-600.
43. Ballotta E, Thiene G, Baracchini C, Ermani M, Militello C, Da Giau G, et al. Surgical vs medical treatment for isolated internal carotid artery elongation with coiling or kinking in symptomatic patients: a prospective randomized clinical study. *J Vasc Surg* 2005;42:838-846.
44. Ballotta E, Manara R, Meneghetti G, Ermani M, Da Giau G, Baracchini C. Diabetes and asymptomatic carotid stenosis: does diabetic disease influence the outcome of carotid endarterectomy?: a 10-year single center experience. *Surgery* 2008;143:519-525.
45. Ballotta E, Da Giau G, Baracchini C, Manara R. Carotid endarterectomy in high-risk patients: a challenge for endovascular procedure protocols. *Surgery* 2004;135:74-80.
46. Ballotta E, Da Giau G. Selective shunting with eversion carotid endarterectomy. *J Vasc Surg* 2003;38:1045-1050.

47. Ballotta E, Da Giau G, Saladini M, Abbruzzese E, Renon L, Toniato A. Carotid endarterectomy with patch closure versus carotid eversion endarterectomy and reimplantation: a prospective randomized study. *Surgery* 1999;125:271-279.
48. Ballotta E, Da Giau G, Renon L. Is diabetes mellitus a risk factor for carotid endarterectomy?: a prospective study. *Surgery* 2001;129:146-152.
49. Ballotta E, Toniato A, Da Giau G, Lorenzetti R, Da Roit A, Baracchini C. Durability of eversion carotid endarterectomy. *J Vasc Surg* 2014;59:1274-1281.
50. Banach M, Kazmierski J, Kowman M, Okonski PK, Sobow T, Kloszewska I, et al. Atrial fibrillation as a nonpsychiatric predictor of delirium after cardiac surgery: a pilot study. *Med Sci Monit* 2008;14:CR286-CR291.
51. Baracchini C, Saladini M, Lorenzetti R, Manara R, Da Giau G, Ballotta E. Gender-based outcomes after eversion carotid endarterectomy from 1998 to 2009. *J Vasc Surg* 2012;55:338-345.
52. Bardia A, Khabbaz K, Mueller A, Mathur P, Novack V, Talmor D, et al. The association between preoperative hemoglobin A1C and postoperative glycemic variability on 30-day major adverse outcomes following isolated cardiac valvular surgery. *Anesth Analg* 2017;124:16-22.
53. Baribeau Y, Westbrook BM, Charlesworth DC, Hearne MJ, Bradley WA, Maloney CT. Brachial gradient in cardiac surgical patients. *Circulation* 2002;106(12 Suppl 1):I11-I13.
54. Barnes RW, Marszalek PB. Asymptomatic carotid disease in the cardiovascular surgical patient: is prophylactic endarterectomy necessary? *Stroke* 1981;12:497-500.
55. Barnes RW, Liebman PR, Marszalek PB, Kirk CL, Goldman MH. The natural history of asymptomatic carotid disease in patients undergoing cardiovascular surgery. *Surgery* 1981;90:1075-1083.
56. Basic J, Assadian A, Strassegger J, Senekowitsch C, Wickenhauser G, Koulas S, et al. Degree of contralateral carotid stenosis improves preoperative risk stratification of patients with asymptomatic ipsilateral carotid stenosis. *J Vasc Surg* 2016;63:82-88.
57. Bastounis E, Filis K, Georgopoulos S, Klonaris C, Xeromeritis N, Papalambros E. Current practice: routine use of shunting in carotid endarterectomy: cost reduction and surgical training. *Int Angiol* 2001;20:218-224.
58. Batchelder A, Hunter J, Cairns V, Sandford R, Munshi A, Naylor AR. Dual antiplatelet therapy prior to expedited carotid surgery reduces recurrent events prior to surgery without significantly increasing peri-operative bleeding complications. *Eur J Vasc Endovasc Surg* 2015;50:412-419.
59. Bechtel JF, Bartels C, Hopstein S, Horsch S. Carotid endarterectomy prior to major abdominal aortic surgery. *J Cardiovasc Surg (Torino)* 2000;41:269-273.
60. Becquemin JP, Ben El Kadi H, Desgranges P, Kobeiter H. Carotid stenting versus carotid surgery: a prospective cohort study. *J Endovasc Ther* 2003;10:687-694.
61. Bellomo R, Goldsmith D, Russell S, Uchino S. Postoperative serious adverse events in a teaching hospital: a prospective study. *Med J Aust* 2002;176:216-218.
62. Bellomo R, Goldsmith D, Uchino S, Buckmaster J, Hart G, Opdam H, et al. Prospective controlled trial of effect of medical emergency team on postoperative morbidity and mortality rates. *Crit Care Med* 2004;32:916-921.
63. Berens ES, Kouchoukos NT, Murphy SF, Wareing TH. Preoperative carotid artery screening in elderly patients undergoing cardiac surgery. *J Vasc Surg* 1992;15:313-323.
64. Bernhardt M, Pflugrad H, Goldbecker A, Barg-Hock H, Knitsch W, Klempnauer J, et al. Central nervous system complications after liver transplantation: common but mostly transient phenomena. *Liver Transpl* 2015;21:224-232.
65. Bertolini P, Santini F, Montalbano G, Pessotto R, Mazzucco A. Single aortic cross-clamp technique in coronary surgery: a prospective randomized study. *Eur J Cardiothorac Surg* 1997;12:413-419.
66. Berwanger O, Le Manach Y, Suzumura EA, Biccari B, Srinathan SK, Szczeklik W, et al. Association between pre-operative statin use and major cardiovascular complications among patients undergoing non-cardiac surgery: the VISION study. *Eur Heart J* 2016;37:177-185.
67. Bilecen S, Peelen LM, Kalkman CJ, Spanjersberg AJ, Moons KG, Nierich AP. Fibrinogen concentrate therapy in complex cardiac surgery. *J Cardiothorac Vasc Anesth* 2013;27:12-17.
68. Bilfinger TV, Reda H, Giron F, Seifert FC, Ricotta JJ. Coronary and carotid operations under prospective standardized conditions: incidence and outcome. *Ann Thorac Surg* 2000;69:1792-1798.
69. Binder RK, Stortecky S, Heg D, Tueller D, Jeger R, Toggweiler S, et al. Procedural results and clinical outcomes of transcatheter aortic valve implantation in Switzerland: an observational cohort study of Sapien 3 versus Sapien XT transcatheter heart valves. *Circ Cardiovasc Interv* 2015;8:e002653.
70. Birincioglu CL, Bayazit M, Ulus AT, Bardakci H, Kucuker SA, Tasdemir O. Carotid disease is a risk factor for stroke in coronary bypass operations. *J Card Surg* 1999;14:417-423.
71. Bishu K, Suri RM, Nkomo VT, Kane GC, Greason KL, Reeder GS, et al. Prognostic impact of pulmonary artery systolic pressure in patients undergoing transcatheter aortic valve replacement for aortic stenosis. *Am J Cardiol* 2014;114:1562-1567.

72. Boehm J, Grammer JB, Lehnert F, Dietrich W, Wagenpfeil S, Wildhirt SM, et al. Factor V Leiden does not affect bleeding in aprotinin recipients after cardiopulmonary bypass. *Anesthesiology* 2007;106:681-686.
73. Borgermann J, Furukawa N, Aboud A, Renner A, Benzinger M, Hakim-Meibodi K, et al. Minimally invasive versus standard approach aortic valve replacement: a propensity score analysis of 808 patients. 2003 Annual Scientific Meeting of Innovations: Technology and Techniques in Cardiothoracic and Vascular Surgery; 2003 Jun 12-15; Prague, CZ.
74. De Borst GJ, Hilgevoord AA, de Vries JP, van der Mee M, Moll FL, van de Pavoordt HD, et al. Influence of antiplatelet therapy on cerebral micro-emboli after carotid endarterectomy using postoperative transcranial Doppler monitoring. *Eur J Vasc Endovasc Surg* 2007;34:135-142.
75. de Borst GJ, Moll FL, van de Pavoordt HD, Mauser HW, Kelder JC, Ackerstaf RG. Stroke from carotid endarterectomy: when and how to reduce perioperative stroke rate? *Eur J Vasc Endovasc Surg* 2001;21:484-489.
76. Borstad E, Urdal K, Handeland G, Abildgaard U. Comparison of low molecular weight heparin vs. unfractionated heparin in gynecological surgery. II: reduced dose of low molecular weight heparin. *Acta Obstet Gynecol Scand* 1992;71:471-475.
77. Boudriot E, Thiele H, Walther T, Liebetrau C, Boeckstegers P, Pohl T, et al. Randomized comparison of percutaneous coronary intervention with sirolimus-eluting stents versus coronary artery bypass grafting in unprotected left main stem stenosis. *J Am Coll Cardiol* 2011;57:538-545.
78. Bourke BM, Crimmins DS. Early control of the distal internal carotid artery during endarterectomy: achievability and results. *J Vasc Surg* 2002;36:70-74.
79. Braun MU, Fassbender D, Schoen SP, Haass M, Schraeder R, Scholtz W, et al. Transcatheter closure of patent foramen ovale in patients with cerebral ischemia. *J Am Coll Cardiol* 2002;39:2019-2025.
80. Breuer AC, Furlan AJ, Hanson MR, Lederman RJ, Loop FD, Cosgrove DM, et al. Central nervous system complications of coronary artery bypass graft surgery: prospective analysis of 421 patients. *Stroke* 1983;14:682-687.
81. Brittenden J, Bradbury AW. Are we still performing inappropriate carotid endarterectomy? *Eur J Vasc Endovasc Surg* 2000;20:158-162.
82. Broască M, Nedelcu DE. Study on the chronic antithrombotic treatment after surgical revascularizations in the peripheral arterial disease. *Farmacia* 2013;61:492-502.
83. Brosig T, Hoinkes A, Seitz RJ, Sandmann W, Huber R, Siebler M. Ultrasound turbulence index during thromboendarterectomy predicts postoperative cerebral microembolism. *Cerebrovasc Dis* 2008;26:87-92.
84. Budera P, Straka Z, Osmančík P, Vaněk T, Jelínek Š, Hlavička J, et al. Comparison of cardiac surgery with left atrial surgical ablation vs. cardiac surgery without atrial ablation in patients with coronary and/or valvular heart disease plus atrial fibrillation: final results of the PRAGUE-12 randomized multicentre study. *Eur Heart J* 2012;33:2644-2652.
85. Bull DA, Neumayer LA, Hunter GC, Kekszi J, Sethi GK, McIntyre KE, et al. Risk factors for stroke in patients undergoing coronary artery bypass grafting. *Cardiovasc Surg* 1993;1:182-185.
86. Camous J, Decrombecque T, Louvain-Quintard V, Doubine S, Darteville P, Stéphan F. Outcomes of patients with antiphospholipid syndrome after pulmonary endarterectomy. *Eur J Cardiothorac Surg* 2014;46:116-120.
87. Canaud L, Alric P, Gandet T, Albat B, Marty-Ané C, Berthet JP. Surgical conversion after thoracic endovascular aortic repair. *J Thorac Cardiovasc Surg* 2011;142:1027-1031.
88. Cao P, Giordano G, De Rango P, Caporali S, Lenti M, Ricci S, et al. Eversion versus conventional carotid endarterectomy: a prospective study. *Eur J Vasc Endovasc Surg* 1997;14:96-104.
89. Cao P, Giordano G, De Rango P, Zannetti S, Chiesa R, Coppi G, et al. Eversion versus conventional carotid endarterectomy: late results of a prospective multicenter randomized trial. *J Vasc Surg* 2000;31(1 Pt 1):19-30.
90. Carrier M, Pelletier LC, Searle NR. Does retrograde administration of blood cardioplegia improve myocardial protection during first operation for coronary artery bypass grafting? *Ann Thorac Surg* 1997;64:1256-1262.
91. Castriota F, de Campos Martins EC, Setacci C, Manetti R, Khamis H, Spagnolo B, et al. Cutting balloon angioplasty in percutaneous carotid interventions. *J Endovasc Ther* 2008;15:655-662.
92. Chen J, Zimmerman RA, Jarvik GP, Nord AS, Clancy RR, Wernovsky G, et al. Perioperative stroke in infants undergoing open heart operations for congenital heart disease. *Ann Thorac Surg* 2009;88:823-829.
93. Cieri E, De Rango P, Maccaroni MR, Spaccatini A, Caso V, Cao P. Is haemodynamic depression during carotid stenting a predictor of peri-procedural complications? *Eur J Vasc Endovasc Surg* 2008;35:399-404.
94. Cimochoowski GE, Harostock MD, Foldes PJ. Minimal operative mortality in patients undergoing coronary artery bypass with significant left ventricular dysfunction by maximization of metabolic and mechanical support. *J Thorac Cardiovasc Surg* 1997;113:655-666.
95. Cohen G, Ivanov J, Weisel RD, Rao V, Mohabeer MK, Mickle



- DA. Aprotinin and dipyridamole for the safe reduction of postoperative blood loss. *Ann Thorac Surg* 1998;65:674-683.
96. Cooper EA, Edelman JJ, Black D, Brereton RJ, Ross DE, Bannon PG, et al. Anaortic off-pump coronary artery bypass grafting in the elderly and very elderly. *Heart Lung Circ* 2013;22:989-995.
  97. Coscas R, Rhissassi B, Gruet-Coquet N, Couture T, de Tymowski C, Chiche L, et al. Open surgery remains a valid option for the treatment of recurrent carotid stenosis. *J Vasc Surg* 2010;51:1124-1132.
  98. Crouch G, Sinhal A, Rice G, Baker R, Bennetts J. Long term outcomes of an Australian TAVI program: better than PARTNER? *Heart Lung Circ* 2015;24 Suppl 1:e16.
  99. Da Col U, Di Bella I, Pasquino S, Ramoni E, Paris M, Stracci F, et al. Off-pump technique: a systematic alternative for myocardial revascularization? *J Cardiovasc Med (Hagerstown)* 2008;9:899-904.
  100. Da Silva AF, McCollum P, Szymanska T, de Cossart L. Prospective study of carotid endarterectomy and contralateral carotid occlusion. *Br J Surg* 1996;83:1370-1372.
  101. Dake MD, Miller DC, Mitchell RS, Semba CP, Moore KA, Sakai T. The "first generation" of endovascular stent-grafts for patients with aneurysms of the descending thoracic aorta. *J Thorac Cardiovasc Surg* 1998;116:689-704.
  102. D'Angelo V, Catapano G, Bozzini V, Catapano D, De Vivo P, Del Gaudio A, et al. Propofol EEG burst suppression in carotid endarterectomy. *J Neurosurg Sci* 2001;45:157-162.
  103. Darling RC 3rd, Dylewski M, Chang BB, Paty PS, Kreienberg PB, Lloyd WE, et al. Combined carotid endarterectomy and coronary artery bypass grafting does not increase the risk of perioperative stroke. *Cardiovasc Surg* 1998;6:448-452.
  104. Darwazah AK, Osman M, Sharabati B. Use of off-pump coronary artery bypass surgery among patients with malignant disease. *J Card Surg* 2010;25:1-4.
  105. Davies MJ, Mooney PH, Scott DA, Silbert BS, Cook RJ. Neurologic changes during carotid endarterectomy under cervical block predict a high risk of postoperative stroke. *Anesthesiology* 1993;78:829-833.
  106. Davies JE Jr, McAlexander WW, Sasse MF, Leeser MA, Melby SJ, Singh SP, et al. Impact of transcatheter aortic valve replacement on surgical volumes and outcomes in a tertiary academic cardiac surgical practice. *J Am Coll Surg* 2016;222:645-655.
  107. De Santis F, Chaves Brait CM, Pattaro C, Cesareo V, Di Cintio V. A prospective nonrandomized study on carotid surgery performed under general anesthesia without intraoperative cerebral monitoring. *J Stroke Cerebrovasc Dis* 2016;25:136-143.
  108. Debing E, Van den Brande P. Carotid endarterectomy in the elderly: are the patient characteristics, the early outcome, and the predictors the same as those in younger patients? *Surg Neurol* 2007;67:467-471.
  109. Debing E, Aerden D, van den Brande P. Diabetes mellitus is a predictor for early adverse outcome after carotid endarterectomy. *Vasc Endovascular Surg* 2011;45:28-32.
  110. Deiwick M, Tandler R, Möllhoff T, Kerber S, Rötter J, Roeder N, et al. Heart surgery in patients aged eighty years and above: determinants of morbidity and mortality. *Thorac Cardiovasc Surg* 1997;45:119-126.
  111. Deng Y, Sun Z, Paterson HS. Total arterial revascularisation in left ventricular dysfunction. *J Huazhong Univ Sci Technolog Med Sci* 2006;26:82-85.
  112. Dettler C, Reichenspurner H, Boehm DH, Thalhammer M, Raptis P, Schütz A, et al. Minimally invasive direct coronary artery bypass grafting (MIDCAB) and off-pump coronary artery bypass grafting (OPCAB): two techniques for beating heart surgery. *Heart Surg Forum* 2002;5:157-162.
  113. VISION Pilot Study Investigators, Devereaux PJ, Bradley D, Chan MT, Walsh M, Villar JC, et al. An international prospective cohort study evaluating major vascular complications among patients undergoing noncardiac surgery: the VISION Pilot Study. *Open Med* 2011;5:e193-e200.
  114. Di Biase L, Gaita F, Toso E, Santangeli P, Mohanty P, Rutledge N, et al. Does periprocedural anticoagulation management of atrial fibrillation affect the prevalence of silent thromboembolic lesion detected by diffusion cerebral magnetic resonance imaging in patients undergoing radiofrequency atrial fibrillation ablation with open irrigated catheters?: results from a prospective multicenter study. *Heart Rhythm* 2014;11:791-798.
  115. Didier R, Gaglia MA Jr, Koifman E, Kiramijyan S, Negi SI, Omar AF, et al. Cerebrovascular accidents after percutaneous coronary interventions from 2002 to 2014: incidence, outcomes, and associated variables. *Am Heart J* 2016;172:80-87.
  116. Dinkel M, Schweiger H, Goerlitz P. Monitoring during carotid surgery: somatosensory evoked potentials vs. carotid stump pressure. *J Neurosurg Anesthesiol* 1992;4:167-175.
  117. Donaldson MC, Ivarsson BL, Mannick JA, Whittemore AD. Impact of completion angiography on operative conduct and results of carotid endarterectomy. *Ann Surg* 1993;217:682-687.
  118. Dong H, Jiang X, Peng M, Zou Y, Che W, Qian H, et al. The interval between carotid artery stenting and open heart surgery is related to perioperative complications. *Catheter Cardiovasc Interv* 2016;87 Suppl 1:564-569.
  119. Dong S, Peng Z, Tao Y, Huo Y, Zhou H. Metabolic syndrome is

- associated with increased risk of short-term post-procedural complications after carotid artery stenting. *Neurol Sci* 2017; 38:1933-1939.
120. Dorigo W, Pulli R, Marek J, Troisi N, Pratesi G, Innocenti AA, et al. Carotid endarterectomy in female patients. *J Vasc Surg* 2009;50:1301-1307.
  121. Lam RC, Lin SC, DeRubertis B, Hyneczek R, Kent KC, Faries PL. The impact of increasing age on anatomic factors affecting carotid angioplasty and stenting. *J Vasc Surg* 2007;45:875-880.
  122. Larsen SF, Zaric D, Boysen G. Postoperative cerebrovascular accidents in general surgery. *Acta Anaesthesiol Scand* 1988;32:698-701.
  123. Lee JD, Bonaros N, Hong PT, Kofler M, Srivastava M, Herr DL, et al. Factors influencing hospital length of stay after robotic totally endoscopic coronary artery bypass grafting. *Ann Thorac Surg* 2013;95:813-818.
  124. Lennard N, Smith JL, Gaunt ME, Abbott RJ, London NJ, Bell PR, et al. A policy of quality control assessment helps to reduce the risk of intraoperative stroke during carotid endarterectomy. *Eur J Vasc Endovasc Surg* 1999;17:234-240.
  125. Liapis CD, Kakisis JD, Kostakis AG. Recurrent carotid artery stenosis: natural history and predisposing factors: a long-term follow-up study. *Int Angiol* 2001;20:330-336.
  126. Likosky DS, Leavitt BJ, Marrin CA, Malenka DJ, Reeves AG, Weintraub RM, et al. Intra- and postoperative predictors of stroke after coronary artery bypass grafting. *Ann Thorac Surg* 2003;76:428-435.
  127. Van der Linden J, Bergman P, Hadjinikolaou L. The topography of aortic atherosclerosis enhances its precision as a predictor of stroke. *Ann Thorac Surg* 2007;83:2087-2092.
  128. Loponen P, Taskinen P, Laakkonen E, Nissinen J, Luther M, Wistbacka JO. Perioperative stroke in coronary artery bypass patients. *Scand J Surg* 2003;92:148-155.
  129. Love A, Hollyoak MA. Carotid endarterectomy and local anaesthesia: reducing the disasters. *Cardiovasc Surg* 2000;8: 429-435.
  130. Lübke T, Ahmad W, Koushk Jalali B, Brunkwall J. Gender-based 30-day and long-term outcomes after carotid endarterectomy. *Vasa* 2015;44:289-295.
  131. MacDonald P, Stadnyk K, Cossett J, Klassen G, Johnstone D, Rockwood K. Outcomes of coronary artery bypass surgery in elderly people. *Can J Cardiol* 1998;14:1215-1222.
  132. Mandeville Y, Canovai E, Diebels I, Suy R, De Vleeschauer P. Carotid bifurcation resection and interposition of a polytetrafluoroethylene graft (BRIG) for carotid disease: a retrospective study of 153 consecutive procedures. *Ann Vasc Surg* 2015;29:1589-1597.
  133. Mattos MA, Hodgson KJ, Londrey GL, Barkmeier LD, Ramsey DE, Garfield M, et al. Carotid endarterectomy: operative risks, recurrent stenosis, and long-term stroke rates in a modern series. *J Cardiovasc Surg (Torino)* 1992;33:387-400.
  134. McCollum PT, da Silva A, Ridler BD, de Cossart L. Carotid endarterectomy in the U.K. and Ireland: audit of 30-day outcome. The Audit Committee for the Vascular Surgical Society. *Eur J Vasc Endovasc Surg* 1997;14:386-391.
  135. McKhann GM, Grega MA, Borowicz LM Jr, Bechamps M, Selnes OA, Baumgartner WA, et al. Encephalopathy and stroke after coronary artery bypass grafting: incidence, consequences, and prediction. *Arch Neurol* 2002;59:1422-1428.
  136. Mitchell RS, Miller DC, Dake MD, Semba CP, Moore KA, Sakai T. Thoracic aortic aneurysm repair with an endovascular stent graft: the "first generation". *Ann Thorac Surg* 1999;67: 1971-1980.
  137. Mukerji N, Manjunath Prasad KS, Vivar R, Mendelow AD. Carotid endarterectomy: safe and effective in a neurosurgeon's hands: a 25-year single-surgeon experience. *World Neurosurg* 2015;83:74-79.
  138. Mullenix PS, Andersen CA, Olsen SB, Tollefson DF. Carotid endarterectomy remains the gold standard. *Am J Surg* 2002; 183:580-583.
  139. Naylor AR, Hayes PD, Allroggen H, Lennard N, Gaunt ME, Thompson MM, et al. Reducing the risk of carotid surgery: a 7-year audit of the role of monitoring and quality control assessment. *J Vasc Surg* 2000;32:750-759.
  140. Newman MF, Wolman R, Kanchuger M, Marschall K, Mora-Mangano C, Roach G, et al. Multicenter preoperative stroke risk index for patients undergoing coronary artery bypass graft surgery. Multicenter Study of Perioperative Ischemia (McSPI) Research Group. *Circulation* 1996;94(9 Suppl):II74-II80.
  141. Nicholls SC, Phillips DJ, Bergelin RO, Beach KW, Primozich JF, Strandness DE Jr. Carotid endarterectomy: relationship of outcome to early restenosis. *J Vasc Surg* 1985;2:375-381.
  142. Nordanstig A, Rosengren L, Strömberg S, Österberg K, Karlsson L, Bergström G, et al. Editor's choice: very urgent carotid endarterectomy is associated with an increased procedural risk: the carotid alarm study. *Eur J Vasc Endovasc Surg* 2017;54:278-286.
  143. Ott DA, Cooley DA, Chapa L, Coelho A. Carotid endarterectomy without temporary intraluminal shunt: study of 309 consecutive operations. *Ann Surg* 1980;191:708-714.
  144. Pell JP, Slack R, Dennis M, Welch G. Improvements in carotid endarterectomy in Scotland: results of a national prospective survey. *Scott Med J* 2004;49:53-56.
  145. Radu H, Bertog SC, Robertson G, Franke J, Rabe K, Hornung M, et al. Long-term results after carotid stent implantation. *J*

- Interv Cardiol* 2013;26:613–622.
146. Rafiq S, Johansson PI, Ostrowski SR, Stissing T, Steinbrüchel DA. Hypercoagulability in patients undergoing coronary artery bypass grafting: prevalence, patient characteristics and postoperative outcome. *Eur J Cardiothorac Surg* 2012;41:550–555.
  147. Roach GW, Kanchuger M, Mangano CM, Newman M, Nussmeier N, Wolman R, et al. Adverse cerebral outcomes after coronary bypass surgery: Multicenter Study of Perioperative Ischemia Research Group and the Ischemia Research and Education Foundation Investigators. *N Engl J Med* 1996;335:1857–1863.
  148. Saini A, Hu YL, Kasirajan V, Han FT, Khan MZ, Wolfe L, et al. Long-term outcomes of minimally invasive surgical ablation for atrial fibrillation: a single-center experience. *Heart Rhythm* 2017;14:1281–1288.
  149. Salazar JD, Wityk RJ, Grega MA, Borowicz LM, Doty JR, Petrofski JA, et al. Stroke after cardiac surgery: short- and long-term outcomes. *Ann Thorac Surg* 2001;72:1195–1202.
  150. Salem MK, Sayers RD, Bown MJ, Eveson DJ, Robinson TG, Naylor AR. Rapid access carotid endarterectomy can be performed in the hyperacute period without a significant increase in procedural risks. *Eur J Vasc Endovasc Surg* 2011;41:222–228.
  151. Samson RH, Showalter DP, Yunis JP. Routine carotid endarterectomy without a shunt, even in the presence of a contralateral occlusion. *Cardiovasc Surg* 1998;6:475–484.
  152. Sandison AJ, Wood CH, Padayachee TS, Colchester AC, Taylor PR. Cost-effective carotid endarterectomy. *Br J Surg* 2000;87:323–327.
  153. De Santo LS, Bancone C, Santarpino G, Romano G, De Feo M, Scardone M, et al. Microbiologically documented nosocomial infections after cardiac surgery: an 18-month prospective tertiary care centre report. *Eur J Cardiothorac Surg* 2008;33:666–672.
  154. Schmitz C, Weinreich S, White J, Oengoeren I, Schneider R, Schneider D, et al. Can particulate extraction from the ascending aorta reduce neurologic injury in cardiac surgery? *J Thorac Cardiovasc Surg* 2003;126:1829–1838.
  155. Schneider JR, Droste JS, Golan JF. Impact of carotid endarterectomy critical pathway on surgical outcome and hospital stay. *Vasc Endovascular Surg* 1997;31:685–692.
  156. Schoenfeld E, Donas K, Radicke A, Osada N, Austermann M, Torsello G. Perioperative use of aspirin for patients undergoing carotid endarterectomy. *Vasa* 2012;41:282–287.
  157. Schoof J, Lubahn W, Baeumer M, Kross R, Wallesch CW, Kozian A, et al. Impaired cerebral autoregulation distal to carotid stenosis/occlusion is associated with increased risk of stroke at cardiac surgery with cardiopulmonary bypass. *J Thorac Cardiovasc Surg* 2007;134:690–696.
  158. Senay S, Toraman F, Akgün Y, Aydin E, Karabulut H, Alhan C, et al. Stroke after coronary bypass surgery is mainly related to diffuse atherosclerotic disease. *Heart Surg Forum* 2011;14:E366–E372.
  159. Shapira OM, Hunter CT, Anter E, Bao Y, DeAndrade K, Lazar HL, et al. Coronary artery bypass grafting in patients with severe left ventricular dysfunction: early and mid-term outcomes. *J Card Surg* 2006;21:225–232.
  160. Shaw PJ, Bates D, Cartlidge NE, Heaviside D, Julian DG, Shaw DA. Early neurological complications of coronary artery bypass surgery. *Br Med J (Clin Res Ed)* 1985;291:1384–1387.
  161. Spes CH, Schwende A, Beier F, Hug M, Hein R, Strohm H, et al. Short- and long-term outcome after carotid artery stenting with neuroprotection: single-center experience within a prospective registry. *Clin Res Cardiol* 2007;96:812–821.
  162. Stabile E, Salemme L, Sorropago G, Tesorio T, Nammias W, Miranda M, et al. Proximal endovascular occlusion for carotid artery stenting: results from a prospective registry of 1,300 patients. *J Am Coll Cardiol* 2010;55:1661–1667.
  163. Subban V, Murdoch D, Savage ML, Crowhurst J, Saireddy R, Poon KK, et al. Outcomes of transcatheter aortic valve implantation in high surgical risk and inoperable patients with aortic stenosis: a single Australian Centre experience. *Intern Med J* 2016;46:42–51.
  164. Suematsu Y, Nakano K, Sasako Y, Kobayashi J, Takamoto S. Strategies for CABG patients with carotid artery disease and perioperative neurological complications. *Heart Vessels* 2000;15:129–134.
  165. Takach TJ, Ott DA, Reul GJ, Duncan JM, Livesay JJ, Cooley DA. Carotid endarterectomy: results in asymptomatic and symptomatic patients. *Tex Heart Inst J* 1996;23:42–44.
  166. Tatoulis J, Buxton BF, Fuller JA, Royse AG. Total arterial coronary revascularization: techniques and results in 3,220 patients. *Ann Thorac Surg* 1999;68:2093–2099.
  167. Trehan N, Mishra M, Dhole S, Mishra A, Karlekar A, Kohli VM. Significantly reduced incidence of stroke during coronary artery bypass grafting using transesophageal echocardiography. *Eur J Cardiothorac Surg* 1997;11:234–242.
  168. Trehan N, Mishra M, Kasliwal RR, Mishra A. Reduced neurological injury during CABG in patients with mobile aortic atheromas: a five-year follow-up study. *Ann Thorac Surg* 2000;70:1558–1564.
  169. Verhoeven BA, de Vries JP, Pasterkamp G, Ackerstaff RG, Schoneveld AH, Velema E, et al. Carotid atherosclerotic plaque characteristics are associated with microembolization during carotid endarterectomy and procedural outcome. *Stroke* 2005;36:1735–1740.

170. Veselka J, Cerná D, Zimolová P, Martinkovicová L, Fiedler J, Hájek P, et al. Feasibility, safety, and early outcomes of direct carotid artery stent implantation with use of the FilterWire EZ Embolic Protection System. *Catheter Cardiovasc Interv* 2009;73:733-738.
171. Executive Committee for the Asymptomatic Carotid Atherosclerosis Study. Endarterectomy for asymptomatic carotid artery stenosis. *JAMA* 1995;273:1421-1428.
172. Walkes JC, Earle N, Reardon MJ, Glaeser DH, Wall MJ Jr, Huh J, et al. Outcomes in single versus bilateral internal thoracic artery grafting in coronary artery bypass surgery. *Curr Opin Cardiol* 2002;17:598-601.
173. Weimar T, Schena S, Bailey MS, Maniar HS, Schuessler RB, Cox JL, et al. The cox-maze procedure for lone atrial fibrillation: a single-center experience over 2 decades. *Circ Arrhythm Electrophysiol* 2012;5:8-14.
174. Weinstein GS. Left hemispheric strokes in coronary surgery: implications for end-hole aortic cannulas. *Ann Thorac Surg* 2001;71:128-132.
175. Wenaweser P, Pilgrim T, Guerios E, Stortecky S, Huber C, Khattab AA, et al. Impact of coronary artery disease and percutaneous coronary intervention on outcomes in patients with severe aortic stenosis undergoing transcatheter aortic valve implantation. *EuroIntervention* 2011;7:541-548.
176. Burns RJ, Willoughby JO. South Australian carotid endarterectomy study. *Med J Aust* 1991;154:650-653.
177. Wöhrle J, Gonska B, Rodewald C, Seeger J, Scharnbeck D, Rottbauer W. Transfemoral aortic valve implantation with the New Edwards Sapien 3 valve for treatment of severe aortic stenosis: impact of valve size in a single center experience. *PLoS One* 2016;11:e0151247.
178. Woelfle KD, Bruijnen H, Neu J, Campbell P, Wack C, Loeprecht H. The role of intraoperative digital subtraction angiography for quality control of standard carotid endarterectomy using patch angioplasty. *Cardiovasc Surg* 2002;10:116-122.
179. Wolman RL, Nussmeier NA, Aggarwal A, Kanchuger MS, Roach GW, Newman MF, et al. Cerebral injury after cardiac surgery: identification of a group at extraordinary risk. Multicenter Study of Perioperative Ischemia Research Group (McSPI) and the Ischemia Research Education Foundation (IREF) Investigators. *Stroke* 1999;30:514-522.
180. Wong JH, Lubkey TB, Suarez-Almazor ME, Findlay JM. Improving the appropriateness of carotid endarterectomy: results of a prospective city-wide study. *Stroke* 1999;30:12-15.
181. Yadeau JT, Casciano M, Liu SS, Edmonds CR, Gordon M, Stanton J, et al. Stroke, regional anesthesia in the sitting position, and hypotension: a review of 4169 ambulatory surgery patients. *Reg Anesth Pain Med* 2011;36:430-435.
182. Young B, Moore WS, Robertson JT, Toole JF, Ernst CB, Cohen SN, et al. An analysis of perioperative surgical mortality and morbidity in the asymptomatic carotid atherosclerosis study. ACAS Investigators. Asymptomatic Carotid Atherosclerosis Study. *Stroke* 1996;27:2216-2224.
183. Zannetti S, Cao P, De Rango P, Giordano G, Parlani G, Lenti M, et al. Intraoperative assessment of technical perfection in carotid endarterectomy: a prospective analysis of 1305 completion procedures. Collaborators of the EVEREST study group. Eversion versus standard carotid endarterectomy. *Eur J Vasc Endovasc Surg* 1999;18:52-58.
184. Zarins CK, White RA, Diethrich EB, Shackelton RJ, Siami FS; CaRESS Steering Committee and CaRESS Investigators. Carotid revascularization using endarterectomy or stenting systems (CaRESS): 4-year outcomes. *J Endovasc Ther* 2009;16: 397-409.
185. Zhang L, Bassin L, Cranney G, Lau A, Akhunjy Z, Wolfenden H, et al. Aortic valve replacement after previous cardiac surgery. *Heart Lung Circ* 2015;24 Suppl 1:e21-e22.
186. Ziemann M, Heringlake M, Lenor P, Juhl D, Hanke T, Petersen M, et al. Cytomegalovirus serostatus as predictor for adverse events after cardiac surgery: a prospective observational study. *J Cardiothorac Vasc Anesth* 2017;31:2042-2048.
187. Zipfel B, Buz S, Hammerschmidt R, Krabatsch T, Duesterhoeft V, Hetzer R. Early clinical experience with the E-vita thoracic stent-graft system: a single center study. *J Cardiovasc Surg (Torino)* 2008;49:417-428.
188. Moher D, Liberati A, Tetzlaff J, Altman DG; PRISMA Group. Preferred reporting items for systematic reviews and meta-analyses: the PRISMA statement. *PLoS Med* 2009;6:e1000097.
